# Supplementary material for: Targeted Proteomics Identifies Proteomic Signatures in Liquid Biopsies of the Endometrium to Diagnose Endometrial Cancer and Assist in the Prediction of the Optimal Surgical Treatment
Source: Oxford University Press journal article supplement (doi:10.1158/1078-0432.ccr-17-0474), 2017-08-08
Supplement: 10780432ccr170474-sup-179213_2_supp_4174456_ztg5d6.docx [file 10780432ccr170474-sup-179213_2_supp_4174456_ztg5d6.docx]

| **Protein Name** | **Peptide Sequence** | **Precursor Mz** | **Precursor Charge** | **Product Mz** | **Product Charge** | **Fragment Ion** |
| --- | --- | --- | --- | --- | --- | --- |
| sp|P17931|LEG3_HUMAN | IALDFQR | 431.742702 | 2 | 749.394064 | 1 | y6 |
| sp|P17931|LEG3_HUMAN | IALDFQR | 431.742702 | 2 | 678.35695 | 1 | y5 |
| sp|P17931|LEG3_HUMAN | IALDFQR | 431.742702 | 2 | 565.272886 | 1 | y4 |
| sp|P17931|LEG3_HUMAN | IALDFQR | 431.742702 | 2 | 450.245943 | 1 | y3 |
| sp|P17931|LEG3_HUMAN | IALDFQR | 431.742702 | 2 | 339.682113 | 2 | y5 |
| sp|P17931|LEG3_HUMAN | IALDFQR | 436.746837 | 2 | 759.402333 | 1 | y6 |
| sp|P17931|LEG3_HUMAN | IALDFQR | 436.746837 | 2 | 688.365219 | 1 | y5 |
| sp|P17931|LEG3_HUMAN | IALDFQR | 436.746837 | 2 | 575.281155 | 1 | y4 |
| sp|P17931|LEG3_HUMAN | IALDFQR | 436.746837 | 2 | 460.254212 | 1 | y3 |
| sp|P17931|LEG3_HUMAN | IALDFQR | 436.746837 | 2 | 344.686248 | 2 | y5 |
| sp|P17931|LEG3_HUMAN | GNDVAFHFNPR | 425.207266 | 3 | 551.775065 | 2 | y9 |
| sp|P17931|LEG3_HUMAN | GNDVAFHFNPR | 425.207266 | 3 | 494.261593 | 2 | y8 |
| sp|P17931|LEG3_HUMAN | GNDVAFHFNPR | 425.207266 | 3 | 444.727386 | 2 | y7 |
| sp|P17931|LEG3_HUMAN | GNDVAFHFNPR | 425.207266 | 3 | 409.208829 | 2 | y6 |
| sp|P17931|LEG3_HUMAN | GNDVAFHFNPR | 425.207266 | 3 | 335.674622 | 2 | y5 |
| sp|P17931|LEG3_HUMAN | GNDVAFHFNPR | 428.543355 | 3 | 556.779199 | 2 | y9 |
| sp|P17931|LEG3_HUMAN | GNDVAFHFNPR | 428.543355 | 3 | 499.265728 | 2 | y8 |
| sp|P17931|LEG3_HUMAN | GNDVAFHFNPR | 428.543355 | 3 | 449.731521 | 2 | y7 |
| sp|P17931|LEG3_HUMAN | GNDVAFHFNPR | 428.543355 | 3 | 414.212964 | 2 | y6 |
| sp|P17931|LEG3_HUMAN | GNDVAFHFNPR | 428.543355 | 3 | 340.678757 | 2 | y5 |
| sp|P10451|OSTP_HUMAN | AIPVAQDLNAPSDWDSR | 927.952671 | 2 | 1047.449013 | 1 | y9 |
| sp|P10451|OSTP_HUMAN | AIPVAQDLNAPSDWDSR | 927.952671 | 2 | 933.406085 | 1 | y8 |
| sp|P10451|OSTP_HUMAN | AIPVAQDLNAPSDWDSR | 927.952671 | 2 | 862.368972 | 1 | y7 |
| sp|P10451|OSTP_HUMAN | AIPVAQDLNAPSDWDSR | 927.952671 | 2 | 835.892083 | 2 | y15 |
| sp|P10451|OSTP_HUMAN | AIPVAQDLNAPSDWDSR | 927.952671 | 2 | 993.536371 | 1 | b10 |
| sp|P10451|OSTP_HUMAN | AIPVAQDLNAPSDWDSR | 932.956806 | 2 | 1057.457282 | 1 | y9 |
| sp|P10451|OSTP_HUMAN | AIPVAQDLNAPSDWDSR | 932.956806 | 2 | 943.414354 | 1 | y8 |
| sp|P10451|OSTP_HUMAN | AIPVAQDLNAPSDWDSR | 932.956806 | 2 | 872.377241 | 1 | y7 |
| sp|P10451|OSTP_HUMAN | AIPVAQDLNAPSDWDSR | 932.956806 | 2 | 840.896217 | 2 | y15 |
| sp|P10451|OSTP_HUMAN | AIPVAQDLNAPSDWDSR | 932.956806 | 2 | 993.536371 | 1 | b10 |
| sp|P10451|OSTP_HUMAN | ANDESNEHSDVIDSQELSK | 706.313693 | 3 | 919.473102 | 1 | y8 |
| sp|P10451|OSTP_HUMAN | ANDESNEHSDVIDSQELSK | 706.313693 | 3 | 806.389038 | 1 | y7 |
| sp|P10451|OSTP_HUMAN | ANDESNEHSDVIDSQELSK | 706.313693 | 3 | 908.913409 | 2 | y16 |
| sp|P10451|OSTP_HUMAN | ANDESNEHSDVIDSQELSK | 706.313693 | 3 | 844.392112 | 2 | y15 |
| sp|P10451|OSTP_HUMAN | ANDESNEHSDVIDSQELSK | 706.313693 | 3 | 301.11426 | 1 | b3 |
| sp|P10451|OSTP_HUMAN | ANDESNEHSDVIDSQELSK | 708.985092 | 3 | 927.487301 | 1 | y8 |
| sp|P10451|OSTP_HUMAN | ANDESNEHSDVIDSQELSK | 708.985092 | 3 | 814.403237 | 1 | y7 |
| sp|P10451|OSTP_HUMAN | ANDESNEHSDVIDSQELSK | 708.985092 | 3 | 912.920508 | 2 | y16 |
| sp|P10451|OSTP_HUMAN | ANDESNEHSDVIDSQELSK | 708.985092 | 3 | 848.399212 | 2 | y15 |
| sp|P10451|OSTP_HUMAN | ANDESNEHSDVIDSQELSK | 708.985092 | 3 | 301.11426 | 1 | b3 |
| sp|P35222|CTNB1_HUMAN | LLNDEDQVVVNK | 693.367181 | 2 | 1159.558957 | 1 | y10 |
| sp|P35222|CTNB1_HUMAN | LLNDEDQVVVNK | 693.367181 | 2 | 1045.51603 | 1 | y9 |
| sp|P35222|CTNB1_HUMAN | LLNDEDQVVVNK | 693.367181 | 2 | 459.292559 | 1 | y4 |
| sp|P35222|CTNB1_HUMAN | LLNDEDQVVVNK | 693.367181 | 2 | 360.224145 | 1 | y3 |
| sp|P35222|CTNB1_HUMAN | LLNDEDQVVVNK | 693.367181 | 2 | 580.283117 | 2 | y10 |
| sp|P35222|CTNB1_HUMAN | LLNDEDQVVVNK | 697.37428 | 2 | 1167.573156 | 1 | y10 |
| sp|P35222|CTNB1_HUMAN | LLNDEDQVVVNK | 697.37428 | 2 | 1053.530229 | 1 | y9 |
| sp|P35222|CTNB1_HUMAN | LLNDEDQVVVNK | 697.37428 | 2 | 467.306758 | 1 | y4 |
| sp|P35222|CTNB1_HUMAN | LLNDEDQVVVNK | 697.37428 | 2 | 368.238344 | 1 | y3 |
| sp|P35222|CTNB1_HUMAN | LLNDEDQVVVNK | 697.37428 | 2 | 584.290216 | 2 | y10 |
| sp|P35222|CTNB1_HUMAN | LVQLLVR | 420.786913 | 2 | 628.414071 | 1 | y5 |
| sp|P35222|CTNB1_HUMAN | LVQLLVR | 420.786913 | 2 | 500.355494 | 1 | y4 |
| sp|P35222|CTNB1_HUMAN | LVQLLVR | 420.786913 | 2 | 387.27143 | 1 | y3 |
| sp|P35222|CTNB1_HUMAN | LVQLLVR | 420.786913 | 2 | 314.710674 | 2 | y5 |
| sp|P35222|CTNB1_HUMAN | LVQLLVR | 420.786913 | 2 | 567.38646 | 1 | b5 |
| sp|P35222|CTNB1_HUMAN | LVQLLVR | 425.791047 | 2 | 638.42234 | 1 | y5 |
| sp|P35222|CTNB1_HUMAN | LVQLLVR | 425.791047 | 2 | 510.363763 | 1 | y4 |
| sp|P35222|CTNB1_HUMAN | LVQLLVR | 425.791047 | 2 | 397.279699 | 1 | y3 |
| sp|P35222|CTNB1_HUMAN | LVQLLVR | 425.791047 | 2 | 319.714808 | 2 | y5 |
| sp|P35222|CTNB1_HUMAN | LVQLLVR | 425.791047 | 2 | 567.38646 | 1 | b5 |
| sp|P30041|PRDX6_HUMAN | DFTPVCTTELGR | 698.332284 | 2 | 1032.514256 | 1 | y9 |
| sp|P30041|PRDX6_HUMAN | DFTPVCTTELGR | 698.332284 | 2 | 836.393078 | 1 | y7 |
| sp|P30041|PRDX6_HUMAN | DFTPVCTTELGR | 698.332284 | 2 | 567.284605 | 2 | y10 |
| sp|P30041|PRDX6_HUMAN | DFTPVCTTELGR | 698.332284 | 2 | 516.760766 | 2 | y9 |
| sp|P30041|PRDX6_HUMAN | DFTPVCTTELGR | 698.332284 | 2 | 364.150312 | 1 | b3 |
| sp|P30041|PRDX6_HUMAN | DFTPVCTTELGR | 703.336418 | 2 | 1042.522525 | 1 | y9 |
| sp|P30041|PRDX6_HUMAN | DFTPVCTTELGR | 703.336418 | 2 | 846.401347 | 1 | y7 |
| sp|P30041|PRDX6_HUMAN | DFTPVCTTELGR | 703.336418 | 2 | 572.28874 | 2 | y10 |
| sp|P30041|PRDX6_HUMAN | DFTPVCTTELGR | 703.336418 | 2 | 521.7649 | 2 | y9 |
| sp|P30041|PRDX6_HUMAN | DFTPVCTTELGR | 703.336418 | 2 | 364.150312 | 1 | b3 |
| sp|P30041|PRDX6_HUMAN | LSILYPATTGR | 596.340238 | 2 | 765.388979 | 1 | y7 |
| sp|P30041|PRDX6_HUMAN | LSILYPATTGR | 596.340238 | 2 | 602.32565 | 1 | y6 |
| sp|P30041|PRDX6_HUMAN | LSILYPATTGR | 596.340238 | 2 | 314.207432 | 1 | b3 |
| sp|P30041|PRDX6_HUMAN | LSILYPATTGR | 596.340238 | 2 | 427.291496 | 1 | b4 |
| sp|P30041|PRDX6_HUMAN | LSILYPATTGR | 601.344372 | 2 | 775.397248 | 1 | y7 |
| sp|P30041|PRDX6_HUMAN | LSILYPATTGR | 601.344372 | 2 | 612.333919 | 1 | y6 |
| sp|P30041|PRDX6_HUMAN | LSILYPATTGR | 601.344372 | 2 | 314.207432 | 1 | b3 |
| sp|P30041|PRDX6_HUMAN | LSILYPATTGR | 601.344372 | 2 | 427.291496 | 1 | b4 |
| sp|O00299|CLIC1_HUMAN | LAALNPESNTAGLDIFAK | 922.991265 | 2 | 1476.732899 | 1 | y14 |
| sp|O00299|CLIC1_HUMAN | LAALNPESNTAGLDIFAK | 922.991265 | 2 | 1362.689972 | 1 | y13 |
| sp|O00299|CLIC1_HUMAN | LAALNPESNTAGLDIFAK | 922.991265 | 2 | 681.848624 | 2 | y13 |
| sp|O00299|CLIC1_HUMAN | LAALNPESNTAGLDIFAK | 922.991265 | 2 | 256.165568 | 1 | b3 |
| sp|O00299|CLIC1_HUMAN | LAALNPESNTAGLDIFAK | 922.991265 | 2 | 483.292559 | 1 | b5 |
| sp|O00299|CLIC1_HUMAN | LAALNPESNTAGLDIFAK | 926.998365 | 2 | 1484.747098 | 1 | y14 |
| sp|O00299|CLIC1_HUMAN | LAALNPESNTAGLDIFAK | 926.998365 | 2 | 1370.704171 | 1 | y13 |
| sp|O00299|CLIC1_HUMAN | LAALNPESNTAGLDIFAK | 926.998365 | 2 | 685.855723 | 2 | y13 |
| sp|O00299|CLIC1_HUMAN | LAALNPESNTAGLDIFAK | 926.998365 | 2 | 256.165568 | 1 | b3 |
| sp|O00299|CLIC1_HUMAN | LAALNPESNTAGLDIFAK | 926.998365 | 2 | 483.292559 | 1 | b5 |
| sp|O00299|CLIC1_HUMAN | NSNPALNDNLEK | 664.82568 | 2 | 1127.569128 | 1 | y10 |
| sp|O00299|CLIC1_HUMAN | NSNPALNDNLEK | 664.82568 | 2 | 1013.526201 | 1 | y9 |
| sp|O00299|CLIC1_HUMAN | NSNPALNDNLEK | 664.82568 | 2 | 732.352259 | 1 | y6 |
| sp|O00299|CLIC1_HUMAN | NSNPALNDNLEK | 664.82568 | 2 | 564.288202 | 2 | y10 |
| sp|O00299|CLIC1_HUMAN | NSNPALNDNLEK | 664.82568 | 2 | 316.125159 | 1 | b3 |
| sp|O00299|CLIC1_HUMAN | NSNPALNDNLEK | 668.832779 | 2 | 1135.583327 | 1 | y10 |
| sp|O00299|CLIC1_HUMAN | NSNPALNDNLEK | 668.832779 | 2 | 1021.5404 | 1 | y9 |
| sp|O00299|CLIC1_HUMAN | NSNPALNDNLEK | 668.832779 | 2 | 740.366458 | 1 | y6 |
| sp|O00299|CLIC1_HUMAN | NSNPALNDNLEK | 668.832779 | 2 | 568.295302 | 2 | y10 |
| sp|O00299|CLIC1_HUMAN | NSNPALNDNLEK | 668.832779 | 2 | 316.125159 | 1 | b3 |
| sp|P14618|KPYM_HUMAN | NTGIICTIGPASR | 680.356093 | 2 | 974.508777 | 1 | y9 |
| sp|P14618|KPYM_HUMAN | NTGIICTIGPASR | 680.356093 | 2 | 861.424713 | 1 | y8 |
| sp|P14618|KPYM_HUMAN | NTGIICTIGPASR | 680.356093 | 2 | 487.262322 | 1 | y5 |
| sp|P14618|KPYM_HUMAN | NTGIICTIGPASR | 680.356093 | 2 | 273.119346 | 1 | b3 |
| sp|P14618|KPYM_HUMAN | NTGIICTIGPASR | 680.356093 | 2 | 386.20341 | 1 | b4 |
| sp|P14618|KPYM_HUMAN | NTGIICTIGPASR | 685.360228 | 2 | 984.517046 | 1 | y9 |
| sp|P14618|KPYM_HUMAN | NTGIICTIGPASR | 685.360228 | 2 | 871.432982 | 1 | y8 |
| sp|P14618|KPYM_HUMAN | NTGIICTIGPASR | 685.360228 | 2 | 497.270591 | 1 | y5 |
| sp|P14618|KPYM_HUMAN | NTGIICTIGPASR | 685.360228 | 2 | 273.119346 | 1 | b3 |
| sp|P14618|KPYM_HUMAN | NTGIICTIGPASR | 685.360228 | 2 | 386.20341 | 1 | b4 |
| sp|P14618|KPYM_HUMAN | APIIAVTR | 420.76872 | 2 | 559.356222 | 1 | y5 |
| sp|P14618|KPYM_HUMAN | APIIAVTR | 420.76872 | 2 | 446.272158 | 1 | y4 |
| sp|P14618|KPYM_HUMAN | APIIAVTR | 420.76872 | 2 | 375.235044 | 1 | y3 |
| sp|P14618|KPYM_HUMAN | APIIAVTR | 420.76872 | 2 | 282.181218 | 1 | b3 |
| sp|P14618|KPYM_HUMAN | APIIAVTR | 420.76872 | 2 | 395.265282 | 1 | b4 |
| sp|P14618|KPYM_HUMAN | APIIAVTR | 425.772854 | 2 | 569.364491 | 1 | y5 |
| sp|P14618|KPYM_HUMAN | APIIAVTR | 425.772854 | 2 | 456.280427 | 1 | y4 |
| sp|P14618|KPYM_HUMAN | APIIAVTR | 425.772854 | 2 | 385.243313 | 1 | y3 |
| sp|P14618|KPYM_HUMAN | APIIAVTR | 425.772854 | 2 | 282.181218 | 1 | b3 |
| sp|P14618|KPYM_HUMAN | APIIAVTR | 425.772854 | 2 | 395.265282 | 1 | b4 |
| sp|P07355|ANXA2_HUMAN | GVDEVTIVNILTNR | 771.927937 | 2 | 1142.689184 | 1 | y10 |
| sp|P07355|ANXA2_HUMAN | GVDEVTIVNILTNR | 771.927937 | 2 | 1043.62077 | 1 | y9 |
| sp|P07355|ANXA2_HUMAN | GVDEVTIVNILTNR | 771.927937 | 2 | 942.573091 | 1 | y8 |
| sp|P07355|ANXA2_HUMAN | GVDEVTIVNILTNR | 771.927937 | 2 | 829.489027 | 1 | y7 |
| sp|P07355|ANXA2_HUMAN | GVDEVTIVNILTNR | 776.932071 | 2 | 1152.697453 | 1 | y10 |
| sp|P07355|ANXA2_HUMAN | GVDEVTIVNILTNR | 776.932071 | 2 | 1053.629039 | 1 | y9 |
| sp|P07355|ANXA2_HUMAN | GVDEVTIVNILTNR | 776.932071 | 2 | 952.58136 | 1 | y8 |
| sp|P07355|ANXA2_HUMAN | GVDEVTIVNILTNR | 776.932071 | 2 | 839.497296 | 1 | y7 |
| sp|P07355|ANXA2_HUMAN | QDIAFAYQR | 556.28018 | 2 | 868.467563 | 1 | y7 |
| sp|P07355|ANXA2_HUMAN | QDIAFAYQR | 556.28018 | 2 | 755.383499 | 1 | y6 |
| sp|P07355|ANXA2_HUMAN | QDIAFAYQR | 556.28018 | 2 | 537.277972 | 1 | y4 |
| sp|P07355|ANXA2_HUMAN | QDIAFAYQR | 556.28018 | 2 | 466.240858 | 1 | y3 |
| sp|P07355|ANXA2_HUMAN | QDIAFAYQR | 556.28018 | 2 | 357.176861 | 1 | b3 |
| sp|P07355|ANXA2_HUMAN | QDIAFAYQR | 561.284315 | 2 | 878.475832 | 1 | y7 |
| sp|P07355|ANXA2_HUMAN | QDIAFAYQR | 561.284315 | 2 | 765.391768 | 1 | y6 |
| sp|P07355|ANXA2_HUMAN | QDIAFAYQR | 561.284315 | 2 | 547.286241 | 1 | y4 |
| sp|P07355|ANXA2_HUMAN | QDIAFAYQR | 561.284315 | 2 | 476.249127 | 1 | y3 |
| sp|P07355|ANXA2_HUMAN | QDIAFAYQR | 561.284315 | 2 | 357.176861 | 1 | b3 |
| sp|P15941|MUC1_HUMAN | QGGFLGLSNIK | 567.319305 | 2 | 1005.572757 | 1 | y10 |
| sp|P15941|MUC1_HUMAN | QGGFLGLSNIK | 567.319305 | 2 | 948.551293 | 1 | y9 |
| sp|P15941|MUC1_HUMAN | QGGFLGLSNIK | 567.319305 | 2 | 744.461415 | 1 | y7 |
| sp|P15941|MUC1_HUMAN | QGGFLGLSNIK | 567.319305 | 2 | 631.377351 | 1 | y6 |
| sp|P15941|MUC1_HUMAN | QGGFLGLSNIK | 567.319305 | 2 | 461.271824 | 1 | y4 |
| sp|P15941|MUC1_HUMAN | QGGFLGLSNIK | 571.326405 | 2 | 1013.586956 | 1 | y10 |
| sp|P15941|MUC1_HUMAN | QGGFLGLSNIK | 571.326405 | 2 | 956.565492 | 1 | y9 |
| sp|P15941|MUC1_HUMAN | QGGFLGLSNIK | 571.326405 | 2 | 752.475614 | 1 | y7 |
| sp|P15941|MUC1_HUMAN | QGGFLGLSNIK | 571.326405 | 2 | 639.39155 | 1 | y6 |
| sp|P15941|MUC1_HUMAN | QGGFLGLSNIK | 571.326405 | 2 | 469.286023 | 1 | y4 |
| sp|P15941|MUC1_HUMAN | EGTINVHDVETQFNQYK | 674.656954 | 3 | 827.404629 | 1 | y6 |
| sp|P15941|MUC1_HUMAN | EGTINVHDVETQFNQYK | 674.656954 | 3 | 699.346051 | 1 | y5 |
| sp|P15941|MUC1_HUMAN | EGTINVHDVETQFNQYK | 674.656954 | 3 | 704.828223 | 2 | y11 |
| sp|P15941|MUC1_HUMAN | EGTINVHDVETQFNQYK | 674.656954 | 3 | 464.729792 | 2 | y7 |
| sp|P15941|MUC1_HUMAN | EGTINVHDVETQFNQYK | 677.328354 | 3 | 835.418828 | 1 | y6 |
| sp|P15941|MUC1_HUMAN | EGTINVHDVETQFNQYK | 677.328354 | 3 | 707.36025 | 1 | y5 |
| sp|P15941|MUC1_HUMAN | EGTINVHDVETQFNQYK | 677.328354 | 3 | 708.835322 | 2 | y11 |
| sp|P15941|MUC1_HUMAN | EGTINVHDVETQFNQYK | 677.328354 | 3 | 468.736891 | 2 | y7 |
| sp|P55060|XPO2_HUMAN | ANIVHLMLSSPEQIQK | 603.329344 | 3 | 916.473437 | 1 | y8 |
| sp|P55060|XPO2_HUMAN | ANIVHLMLSSPEQIQK | 603.329344 | 3 | 742.40938 | 1 | y6 |
| sp|P55060|XPO2_HUMAN | ANIVHLMLSSPEQIQK | 603.329344 | 3 | 811.950358 | 2 | y14 |
| sp|P55060|XPO2_HUMAN | ANIVHLMLSSPEQIQK | 603.329344 | 3 | 371.708328 | 2 | y6 |
| sp|P55060|XPO2_HUMAN | ANIVHLMLSSPEQIQK | 603.329344 | 3 | 648.382771 | 1 | b6 |
| sp|P55060|XPO2_HUMAN | ANIVHLMLSSPEQIQK | 606.000744 | 3 | 924.487636 | 1 | y8 |
| sp|P55060|XPO2_HUMAN | ANIVHLMLSSPEQIQK | 606.000744 | 3 | 750.423579 | 1 | y6 |
| sp|P55060|XPO2_HUMAN | ANIVHLMLSSPEQIQK | 606.000744 | 3 | 815.957457 | 2 | y14 |
| sp|P55060|XPO2_HUMAN | ANIVHLMLSSPEQIQK | 606.000744 | 3 | 375.715427 | 2 | y6 |
| sp|P55060|XPO2_HUMAN | ANIVHLMLSSPEQIQK | 606.000744 | 3 | 648.382771 | 1 | b6 |
| sp|P55060|XPO2_HUMAN | LLQTDDEEEAGLLELLK | 965.006778 | 2 | 1574.779575 | 1 | y14 |
| sp|P55060|XPO2_HUMAN | LLQTDDEEEAGLLELLK | 965.006778 | 2 | 785.513117 | 1 | y7 |
| sp|P55060|XPO2_HUMAN | LLQTDDEEEAGLLELLK | 965.006778 | 2 | 502.323525 | 1 | y4 |
| sp|P55060|XPO2_HUMAN | LLQTDDEEEAGLLELLK | 965.006778 | 2 | 851.922714 | 2 | y15 |
| sp|P55060|XPO2_HUMAN | LLQTDDEEEAGLLELLK | 965.006778 | 2 | 355.233982 | 1 | b3 |
| sp|P55060|XPO2_HUMAN | LLQTDDEEEAGLLELLK | 969.013878 | 2 | 1582.793774 | 1 | y14 |
| sp|P55060|XPO2_HUMAN | LLQTDDEEEAGLLELLK | 969.013878 | 2 | 793.527316 | 1 | y7 |
| sp|P55060|XPO2_HUMAN | LLQTDDEEEAGLLELLK | 969.013878 | 2 | 510.337724 | 1 | y4 |
| sp|P55060|XPO2_HUMAN | LLQTDDEEEAGLLELLK | 969.013878 | 2 | 855.929814 | 2 | y15 |
| sp|P55060|XPO2_HUMAN | LLQTDDEEEAGLLELLK | 969.013878 | 2 | 355.233982 | 1 | b3 |
| sp|P50454|SERPH_HUMAN | GVVEVTHDLQK | 408.890943 | 3 | 840.457393 | 1 | y7 |
| sp|P50454|SERPH_HUMAN | GVVEVTHDLQK | 408.890943 | 3 | 741.388979 | 1 | y6 |
| sp|P50454|SERPH_HUMAN | GVVEVTHDLQK | 408.890943 | 3 | 534.787838 | 2 | y9 |
| sp|P50454|SERPH_HUMAN | GVVEVTHDLQK | 408.890943 | 3 | 485.253631 | 2 | y8 |
| sp|P50454|SERPH_HUMAN | GVVEVTHDLQK | 408.890943 | 3 | 420.732334 | 2 | y7 |
| sp|P50454|SERPH_HUMAN | GVVEVTHDLQK | 411.562343 | 3 | 848.471592 | 1 | y7 |
| sp|P50454|SERPH_HUMAN | GVVEVTHDLQK | 411.562343 | 3 | 749.403178 | 1 | y6 |
| sp|P50454|SERPH_HUMAN | GVVEVTHDLQK | 411.562343 | 3 | 538.794937 | 2 | y9 |
| sp|P50454|SERPH_HUMAN | GVVEVTHDLQK | 411.562343 | 3 | 489.26073 | 2 | y8 |
| sp|P50454|SERPH_HUMAN | GVVEVTHDLQK | 411.562343 | 3 | 424.739434 | 2 | y7 |
| sp|P50454|SERPH_HUMAN | DTQSGSLLFIGR | 647.343509 | 2 | 949.546542 | 1 | y9 |
| sp|P50454|SERPH_HUMAN | DTQSGSLLFIGR | 647.343509 | 2 | 862.514514 | 1 | y8 |
| sp|P50454|SERPH_HUMAN | DTQSGSLLFIGR | 647.343509 | 2 | 605.376957 | 1 | y5 |
| sp|P50454|SERPH_HUMAN | DTQSGSLLFIGR | 647.343509 | 2 | 492.292893 | 1 | y4 |
| sp|P50454|SERPH_HUMAN | DTQSGSLLFIGR | 647.343509 | 2 | 345.22448 | 1 | y3 |
| sp|P50454|SERPH_HUMAN | DTQSGSLLFIGR | 652.347643 | 2 | 959.554811 | 1 | y9 |
| sp|P50454|SERPH_HUMAN | DTQSGSLLFIGR | 652.347643 | 2 | 872.522783 | 1 | y8 |
| sp|P50454|SERPH_HUMAN | DTQSGSLLFIGR | 652.347643 | 2 | 615.385226 | 1 | y5 |
| sp|P50454|SERPH_HUMAN | DTQSGSLLFIGR | 652.347643 | 2 | 502.301162 | 1 | y4 |
| sp|P50454|SERPH_HUMAN | DTQSGSLLFIGR | 652.347643 | 2 | 355.232748 | 1 | y3 |
| sp|P16035|TIMP2_HUMAN | EVDSGNDIYGNPIK | 760.865002 | 2 | 1292.611721 | 1 | y12 |
| sp|P16035|TIMP2_HUMAN | EVDSGNDIYGNPIK | 760.865002 | 2 | 1177.584778 | 1 | y11 |
| sp|P16035|TIMP2_HUMAN | EVDSGNDIYGNPIK | 760.865002 | 2 | 919.488358 | 1 | y8 |
| sp|P16035|TIMP2_HUMAN | EVDSGNDIYGNPIK | 760.865002 | 2 | 528.314023 | 1 | y5 |
| sp|P16035|TIMP2_HUMAN | EVDSGNDIYGNPIK | 760.865002 | 2 | 357.249632 | 1 | y3 |
| sp|P16035|TIMP2_HUMAN | EVDSGNDIYGNPIK | 764.872102 | 2 | 1300.62592 | 1 | y12 |
| sp|P16035|TIMP2_HUMAN | EVDSGNDIYGNPIK | 764.872102 | 2 | 1185.598977 | 1 | y11 |
| sp|P16035|TIMP2_HUMAN | EVDSGNDIYGNPIK | 764.872102 | 2 | 927.502558 | 1 | y8 |
| sp|P16035|TIMP2_HUMAN | EVDSGNDIYGNPIK | 764.872102 | 2 | 536.328222 | 1 | y5 |
| sp|P16035|TIMP2_HUMAN | EVDSGNDIYGNPIK | 764.872102 | 2 | 365.263831 | 1 | y3 |
| sp|P09382|LEG1_HUMAN | SFVLNLGK | 439.260728 | 2 | 643.413737 | 1 | y6 |
| sp|P09382|LEG1_HUMAN | SFVLNLGK | 439.260728 | 2 | 544.345323 | 1 | y5 |
| sp|P09382|LEG1_HUMAN | SFVLNLGK | 439.260728 | 2 | 431.261259 | 1 | y4 |
| sp|P09382|LEG1_HUMAN | SFVLNLGK | 439.260728 | 2 | 322.210506 | 2 | y6 |
| sp|P09382|LEG1_HUMAN | SFVLNLGK | 439.260728 | 2 | 334.176132 | 1 | b3 |
| sp|P09382|LEG1_HUMAN | SFVLNLGK | 443.267827 | 2 | 651.427936 | 1 | y6 |
| sp|P09382|LEG1_HUMAN | SFVLNLGK | 443.267827 | 2 | 552.359522 | 1 | y5 |
| sp|P09382|LEG1_HUMAN | SFVLNLGK | 443.267827 | 2 | 439.275458 | 1 | y4 |
| sp|P09382|LEG1_HUMAN | SFVLNLGK | 443.267827 | 2 | 326.217606 | 2 | y6 |
| sp|P09382|LEG1_HUMAN | SFVLNLGK | 443.267827 | 2 | 334.176132 | 1 | b3 |
| sp|P09382|LEG1_HUMAN | LPDGYEFK | 484.739825 | 2 | 758.335546 | 1 | y6 |
| sp|P09382|LEG1_HUMAN | LPDGYEFK | 484.739825 | 2 | 643.308603 | 1 | y5 |
| sp|P09382|LEG1_HUMAN | LPDGYEFK | 484.739825 | 2 | 428.197793 | 2 | y7 |
| sp|P09382|LEG1_HUMAN | LPDGYEFK | 484.739825 | 2 | 675.298432 | 1 | b6 |
| sp|P09382|LEG1_HUMAN | LPDGYEFK | 488.746925 | 2 | 766.349745 | 1 | y6 |
| sp|P09382|LEG1_HUMAN | LPDGYEFK | 488.746925 | 2 | 651.322802 | 1 | y5 |
| sp|P09382|LEG1_HUMAN | LPDGYEFK | 488.746925 | 2 | 432.204893 | 2 | y7 |
| sp|P09382|LEG1_HUMAN | LPDGYEFK | 488.746925 | 2 | 675.298432 | 1 | b6 |
| sp|Q13938|CAYP1_HUMAN | EAVIAAAFAK | 495.784567 | 2 | 790.482151 | 1 | y8 |
| sp|Q13938|CAYP1_HUMAN | EAVIAAAFAK | 495.784567 | 2 | 691.413737 | 1 | y7 |
| sp|Q13938|CAYP1_HUMAN | EAVIAAAFAK | 495.784567 | 2 | 578.329673 | 1 | y6 |
| sp|Q13938|CAYP1_HUMAN | EAVIAAAFAK | 495.784567 | 2 | 507.292559 | 1 | y5 |
| sp|Q13938|CAYP1_HUMAN | EAVIAAAFAK | 495.784567 | 2 | 300.155397 | 1 | b3 |
| sp|Q13938|CAYP1_HUMAN | EAVIAAAFAK | 499.791666 | 2 | 798.49635 | 1 | y8 |
| sp|Q13938|CAYP1_HUMAN | EAVIAAAFAK | 499.791666 | 2 | 699.427936 | 1 | y7 |
| sp|Q13938|CAYP1_HUMAN | EAVIAAAFAK | 499.791666 | 2 | 586.343872 | 1 | y6 |
| sp|Q13938|CAYP1_HUMAN | EAVIAAAFAK | 499.791666 | 2 | 515.306758 | 1 | y5 |
| sp|Q13938|CAYP1_HUMAN | EAVIAAAFAK | 499.791666 | 2 | 300.155397 | 1 | b3 |
| sp|Q13938|CAYP1_HUMAN | SGDGVVTVDDLR | 616.809499 | 2 | 817.441408 | 1 | y7 |
| sp|Q13938|CAYP1_HUMAN | SGDGVVTVDDLR | 616.809499 | 2 | 518.256902 | 1 | y4 |
| sp|Q13938|CAYP1_HUMAN | SGDGVVTVDDLR | 616.809499 | 2 | 317.109175 | 1 | b4 |
| sp|Q13938|CAYP1_HUMAN | SGDGVVTVDDLR | 616.809499 | 2 | 416.177589 | 1 | b5 |
| sp|Q13938|CAYP1_HUMAN | SGDGVVTVDDLR | 616.809499 | 2 | 515.246003 | 1 | b6 |
| sp|Q13938|CAYP1_HUMAN | SGDGVVTVDDLR | 621.813633 | 2 | 827.449677 | 1 | y7 |
| sp|Q13938|CAYP1_HUMAN | SGDGVVTVDDLR | 621.813633 | 2 | 528.265171 | 1 | y4 |
| sp|Q13938|CAYP1_HUMAN | SGDGVVTVDDLR | 621.813633 | 2 | 317.109175 | 1 | b4 |
| sp|Q13938|CAYP1_HUMAN | SGDGVVTVDDLR | 621.813633 | 2 | 416.177589 | 1 | b5 |
| sp|Q13938|CAYP1_HUMAN | SGDGVVTVDDLR | 621.813633 | 2 | 515.246003 | 1 | b6 |
| sp|P42574|CASP3_HUMAN | SGTDVDAANLR | 559.775459 | 2 | 873.442471 | 1 | y8 |
| sp|P42574|CASP3_HUMAN | SGTDVDAANLR | 559.775459 | 2 | 758.415528 | 1 | y7 |
| sp|P42574|CASP3_HUMAN | SGTDVDAANLR | 559.775459 | 2 | 659.347114 | 1 | y6 |
| sp|P42574|CASP3_HUMAN | SGTDVDAANLR | 559.775459 | 2 | 544.320171 | 1 | y5 |
| sp|P42574|CASP3_HUMAN | SGTDVDAANLR | 559.775459 | 2 | 361.13539 | 1 | b4 |
| sp|P42574|CASP3_HUMAN | SGTDVDAANLR | 564.779593 | 2 | 883.45074 | 1 | y8 |
| sp|P42574|CASP3_HUMAN | SGTDVDAANLR | 564.779593 | 2 | 768.423797 | 1 | y7 |
| sp|P42574|CASP3_HUMAN | SGTDVDAANLR | 564.779593 | 2 | 669.355383 | 1 | y6 |
| sp|P42574|CASP3_HUMAN | SGTDVDAANLR | 564.779593 | 2 | 554.32844 | 1 | y5 |
| sp|P42574|CASP3_HUMAN | SGTDVDAANLR | 564.779593 | 2 | 361.13539 | 1 | b4 |
| sp|P16949|STMN1_HUMAN | SHEAEVLK | 456.742899 | 2 | 688.387582 | 1 | y6 |
| sp|P16949|STMN1_HUMAN | SHEAEVLK | 456.742899 | 2 | 559.344989 | 1 | y5 |
| sp|P16949|STMN1_HUMAN | SHEAEVLK | 456.742899 | 2 | 413.226885 | 2 | y7 |
| sp|P16949|STMN1_HUMAN | SHEAEVLK | 456.742899 | 2 | 653.28893 | 1 | b6 |
| sp|P16949|STMN1_HUMAN | SHEAEVLK | 456.742899 | 2 | 766.372994 | 1 | b7 |
| sp|P16949|STMN1_HUMAN | SHEAEVLK | 460.749999 | 2 | 696.401781 | 1 | y6 |
| sp|P16949|STMN1_HUMAN | SHEAEVLK | 460.749999 | 2 | 567.359188 | 1 | y5 |
| sp|P16949|STMN1_HUMAN | SHEAEVLK | 460.749999 | 2 | 417.233984 | 2 | y7 |
| sp|P16949|STMN1_HUMAN | SHEAEVLK | 460.749999 | 2 | 653.28893 | 1 | b6 |
| sp|P16949|STMN1_HUMAN | SHEAEVLK | 460.749999 | 2 | 766.372994 | 1 | b7 |
| sp|P16949|STMN1_HUMAN | AIEENNNFSK | 583.277834 | 2 | 981.427215 | 1 | y8 |
| sp|P16949|STMN1_HUMAN | AIEENNNFSK | 583.277834 | 2 | 852.384622 | 1 | y7 |
| sp|P16949|STMN1_HUMAN | AIEENNNFSK | 583.277834 | 2 | 723.342029 | 1 | y6 |
| sp|P16949|STMN1_HUMAN | AIEENNNFSK | 583.277834 | 2 | 491.217245 | 2 | y8 |
| sp|P16949|STMN1_HUMAN | AIEENNNFSK | 583.277834 | 2 | 314.171047 | 1 | b3 |
| sp|P16949|STMN1_HUMAN | AIEENNNFSK | 587.284934 | 2 | 989.441414 | 1 | y8 |
| sp|P16949|STMN1_HUMAN | AIEENNNFSK | 587.284934 | 2 | 860.398821 | 1 | y7 |
| sp|P16949|STMN1_HUMAN | AIEENNNFSK | 587.284934 | 2 | 731.356228 | 1 | y6 |
| sp|P16949|STMN1_HUMAN | AIEENNNFSK | 587.284934 | 2 | 495.224345 | 2 | y8 |
| sp|P16949|STMN1_HUMAN | AIEENNNFSK | 587.284934 | 2 | 314.171047 | 1 | b3 |
| sp|P14780|MMP9_HUMAN | SLGPALLLLQK | 576.871174 | 2 | 952.618979 | 1 | y9 |
| sp|P14780|MMP9_HUMAN | SLGPALLLLQK | 576.871174 | 2 | 895.597515 | 1 | y8 |
| sp|P14780|MMP9_HUMAN | SLGPALLLLQK | 576.871174 | 2 | 614.423573 | 1 | y5 |
| sp|P14780|MMP9_HUMAN | SLGPALLLLQK | 576.871174 | 2 | 476.813127 | 2 | y9 |
| sp|P14780|MMP9_HUMAN | SLGPALLLLQK | 576.871174 | 2 | 448.302396 | 2 | y8 |
| sp|P14780|MMP9_HUMAN | SLGPALLLLQK | 580.878273 | 2 | 960.633178 | 1 | y9 |
| sp|P14780|MMP9_HUMAN | SLGPALLLLQK | 580.878273 | 2 | 903.611714 | 1 | y8 |
| sp|P14780|MMP9_HUMAN | SLGPALLLLQK | 580.878273 | 2 | 622.437772 | 1 | y5 |
| sp|P14780|MMP9_HUMAN | SLGPALLLLQK | 580.878273 | 2 | 480.820227 | 2 | y9 |
| sp|P14780|MMP9_HUMAN | SLGPALLLLQK | 580.878273 | 2 | 452.309495 | 2 | y8 |
| sp|P14780|MMP9_HUMAN | AFALWSAVTPLTFTR | 840.95904 | 2 | 1278.684098 | 1 | y11 |
| sp|P14780|MMP9_HUMAN | AFALWSAVTPLTFTR | 840.95904 | 2 | 1092.604785 | 1 | y10 |
| sp|P14780|MMP9_HUMAN | AFALWSAVTPLTFTR | 840.95904 | 2 | 934.535643 | 1 | y8 |
| sp|P14780|MMP9_HUMAN | AFALWSAVTPLTFTR | 840.95904 | 2 | 734.419551 | 1 | y6 |
| sp|P14780|MMP9_HUMAN | AFALWSAVTPLTFTR | 840.95904 | 2 | 290.149918 | 1 | b3 |
| sp|P14780|MMP9_HUMAN | AFALWSAVTPLTFTR | 845.963174 | 2 | 1288.692367 | 1 | y11 |
| sp|P14780|MMP9_HUMAN | AFALWSAVTPLTFTR | 845.963174 | 2 | 1102.613054 | 1 | y10 |
| sp|P14780|MMP9_HUMAN | AFALWSAVTPLTFTR | 845.963174 | 2 | 944.543912 | 1 | y8 |
| sp|P14780|MMP9_HUMAN | AFALWSAVTPLTFTR | 845.963174 | 2 | 744.42782 | 1 | y6 |
| sp|P14780|MMP9_HUMAN | AFALWSAVTPLTFTR | 845.963174 | 2 | 290.149918 | 1 | b3 |
| sp|P08670|VIME_HUMAN | ILLAELEQLK | 585.360639 | 2 | 943.545873 | 1 | y8 |
| sp|P08670|VIME_HUMAN | ILLAELEQLK | 585.360639 | 2 | 830.461809 | 1 | y7 |
| sp|P08670|VIME_HUMAN | ILLAELEQLK | 585.360639 | 2 | 759.424696 | 1 | y6 |
| sp|P08670|VIME_HUMAN | ILLAELEQLK | 585.360639 | 2 | 472.276575 | 2 | y8 |
| sp|P08670|VIME_HUMAN | ILLAELEQLK | 585.360639 | 2 | 340.259468 | 1 | b3 |
| sp|P08670|VIME_HUMAN | ILLAELEQLK | 589.367738 | 2 | 951.560072 | 1 | y8 |
| sp|P08670|VIME_HUMAN | ILLAELEQLK | 589.367738 | 2 | 838.476008 | 1 | y7 |
| sp|P08670|VIME_HUMAN | ILLAELEQLK | 589.367738 | 2 | 767.438895 | 1 | y6 |
| sp|P08670|VIME_HUMAN | ILLAELEQLK | 589.367738 | 2 | 476.283674 | 2 | y8 |
| sp|P08670|VIME_HUMAN | ILLAELEQLK | 589.367738 | 2 | 340.259468 | 1 | b3 |
| sp|P08670|VIME_HUMAN | ISLPLPNFSSLNLR | 785.951215 | 2 | 1257.694997 | 1 | y11 |
| sp|P08670|VIME_HUMAN | ISLPLPNFSSLNLR | 785.951215 | 2 | 1047.558169 | 1 | y9 |
| sp|P08670|VIME_HUMAN | ISLPLPNFSSLNLR | 785.951215 | 2 | 685.893169 | 2 | y12 |
| sp|P08670|VIME_HUMAN | ISLPLPNFSSLNLR | 785.951215 | 2 | 629.351137 | 2 | y11 |
| sp|P08670|VIME_HUMAN | ISLPLPNFSSLNLR | 785.951215 | 2 | 524.282723 | 2 | y9 |
| sp|P08670|VIME_HUMAN | ISLPLPNFSSLNLR | 790.955349 | 2 | 1267.703266 | 1 | y11 |
| sp|P08670|VIME_HUMAN | ISLPLPNFSSLNLR | 790.955349 | 2 | 1057.566438 | 1 | y9 |
| sp|P08670|VIME_HUMAN | ISLPLPNFSSLNLR | 790.955349 | 2 | 690.897303 | 2 | y12 |
| sp|P08670|VIME_HUMAN | ISLPLPNFSSLNLR | 790.955349 | 2 | 634.355271 | 2 | y11 |
| sp|P08670|VIME_HUMAN | ISLPLPNFSSLNLR | 790.955349 | 2 | 529.286857 | 2 | y9 |
| sp|P16070|CD44_HUMAN | TEAADLCK | 454.213117 | 2 | 806.37128 | 1 | y7 |
| sp|P16070|CD44_HUMAN | TEAADLCK | 454.213117 | 2 | 677.328687 | 1 | y6 |
| sp|P16070|CD44_HUMAN | TEAADLCK | 454.213117 | 2 | 606.291573 | 1 | y5 |
| sp|P16070|CD44_HUMAN | TEAADLCK | 454.213117 | 2 | 535.254459 | 1 | y4 |
| sp|P16070|CD44_HUMAN | TEAADLCK | 454.213117 | 2 | 302.134661 | 1 | b3 |
| sp|P16070|CD44_HUMAN | TEAADLCK | 458.220217 | 2 | 814.385479 | 1 | y7 |
| sp|P16070|CD44_HUMAN | TEAADLCK | 458.220217 | 2 | 685.342886 | 1 | y6 |
| sp|P16070|CD44_HUMAN | TEAADLCK | 458.220217 | 2 | 614.305772 | 1 | y5 |
| sp|P16070|CD44_HUMAN | TEAADLCK | 458.220217 | 2 | 543.268658 | 1 | y4 |
| sp|P16070|CD44_HUMAN | TEAADLCK | 458.220217 | 2 | 302.134661 | 1 | b3 |
| sp|P15328|FOLR1_HUMAN | TELLNVCMNAK | 646.820498 | 2 | 1062.543448 | 1 | y9 |
| sp|P15328|FOLR1_HUMAN | TELLNVCMNAK | 646.820498 | 2 | 949.459384 | 1 | y8 |
| sp|P15328|FOLR1_HUMAN | TELLNVCMNAK | 646.820498 | 2 | 836.37532 | 1 | y7 |
| sp|P15328|FOLR1_HUMAN | TELLNVCMNAK | 646.820498 | 2 | 623.263978 | 1 | y5 |
| sp|P15328|FOLR1_HUMAN | TELLNVCMNAK | 646.820498 | 2 | 344.181612 | 1 | b3 |
| sp|P15328|FOLR1_HUMAN | TELLNVCMNAK | 650.827597 | 2 | 1070.557647 | 1 | y9 |
| sp|P15328|FOLR1_HUMAN | TELLNVCMNAK | 650.827597 | 2 | 957.473583 | 1 | y8 |
| sp|P15328|FOLR1_HUMAN | TELLNVCMNAK | 650.827597 | 2 | 844.389519 | 1 | y7 |
| sp|P15328|FOLR1_HUMAN | TELLNVCMNAK | 650.827597 | 2 | 631.278177 | 1 | y5 |
| sp|P15328|FOLR1_HUMAN | TELLNVCMNAK | 650.827597 | 2 | 344.181612 | 1 | b3 |
| sp|P15328|FOLR1_HUMAN | FNWNHCGEMAPACK | 574.570893 | 3 | 475.23333 | 1 | y4 |
| sp|P15328|FOLR1_HUMAN | FNWNHCGEMAPACK | 574.570893 | 3 | 787.818495 | 2 | y13 |
| sp|P15328|FOLR1_HUMAN | FNWNHCGEMAPACK | 574.570893 | 3 | 730.797031 | 2 | y12 |
| sp|P15328|FOLR1_HUMAN | FNWNHCGEMAPACK | 574.570893 | 3 | 637.757375 | 2 | y11 |
| sp|P15328|FOLR1_HUMAN | FNWNHCGEMAPACK | 577.242293 | 3 | 483.247529 | 1 | y4 |
| sp|P15328|FOLR1_HUMAN | FNWNHCGEMAPACK | 577.242293 | 3 | 791.825594 | 2 | y13 |
| sp|P15328|FOLR1_HUMAN | FNWNHCGEMAPACK | 577.242293 | 3 | 734.804131 | 2 | y12 |
| sp|P15328|FOLR1_HUMAN | FNWNHCGEMAPACK | 577.242293 | 3 | 641.764474 | 2 | y11 |
| sp|O43852|CALU_HUMAN | TFDQLTPEESK | 647.811707 | 2 | 1046.500045 | 1 | y9 |
| sp|O43852|CALU_HUMAN | TFDQLTPEESK | 647.811707 | 2 | 803.414525 | 1 | y7 |
| sp|O43852|CALU_HUMAN | TFDQLTPEESK | 647.811707 | 2 | 589.282782 | 1 | y5 |
| sp|O43852|CALU_HUMAN | TFDQLTPEESK | 647.811707 | 2 | 364.150312 | 1 | b3 |
| sp|O43852|CALU_HUMAN | TFDQLTPEESK | 647.811707 | 2 | 492.208889 | 1 | b4 |
| sp|O43852|CALU_HUMAN | TFDQLTPEESK | 651.818806 | 2 | 1054.514244 | 1 | y9 |
| sp|O43852|CALU_HUMAN | TFDQLTPEESK | 651.818806 | 2 | 811.428724 | 1 | y7 |
| sp|O43852|CALU_HUMAN | TFDQLTPEESK | 651.818806 | 2 | 597.296981 | 1 | y5 |
| sp|O43852|CALU_HUMAN | TFDQLTPEESK | 651.818806 | 2 | 364.150312 | 1 | b3 |
| sp|O43852|CALU_HUMAN | TFDQLTPEESK | 651.818806 | 2 | 492.208889 | 1 | b4 |
| sp|P09603|CSF1_HUMAN | AFLLVQDIMEDTMR | 841.418033 | 2 | 1237.555134 | 1 | y10 |
| sp|P09603|CSF1_HUMAN | AFLLVQDIMEDTMR | 841.418033 | 2 | 1138.48672 | 1 | y9 |
| sp|P09603|CSF1_HUMAN | AFLLVQDIMEDTMR | 841.418033 | 2 | 1010.428143 | 1 | y8 |
| sp|P09603|CSF1_HUMAN | AFLLVQDIMEDTMR | 841.418033 | 2 | 332.196868 | 1 | b3 |
| sp|P09603|CSF1_HUMAN | AFLLVQDIMEDTMR | 841.418033 | 2 | 445.280932 | 1 | b4 |
| sp|P09603|CSF1_HUMAN | AFLLVQDIMEDTMR | 846.422168 | 2 | 1247.563403 | 1 | y10 |
| sp|P09603|CSF1_HUMAN | AFLLVQDIMEDTMR | 846.422168 | 2 | 1148.494989 | 1 | y9 |
| sp|P09603|CSF1_HUMAN | AFLLVQDIMEDTMR | 846.422168 | 2 | 1020.436412 | 1 | y8 |
| sp|P09603|CSF1_HUMAN | AFLLVQDIMEDTMR | 846.422168 | 2 | 332.196868 | 1 | b3 |
| sp|P09603|CSF1_HUMAN | AFLLVQDIMEDTMR | 846.422168 | 2 | 445.280932 | 1 | b4 |
| sp|P09603|CSF1_HUMAN | TFYETPLQLLEK | 741.39795 | 2 | 1233.672531 | 1 | y10 |
| sp|P09603|CSF1_HUMAN | TFYETPLQLLEK | 741.39795 | 2 | 617.339903 | 2 | y10 |
| sp|P09603|CSF1_HUMAN | TFYETPLQLLEK | 741.39795 | 2 | 412.186697 | 1 | b3 |
| sp|P09603|CSF1_HUMAN | TFYETPLQLLEK | 741.39795 | 2 | 541.22929 | 1 | b4 |
| sp|P09603|CSF1_HUMAN | TFYETPLQLLEK | 745.405049 | 2 | 1241.68673 | 1 | y10 |
| sp|P09603|CSF1_HUMAN | TFYETPLQLLEK | 745.405049 | 2 | 621.347003 | 2 | y10 |
| sp|P09603|CSF1_HUMAN | TFYETPLQLLEK | 745.405049 | 2 | 412.186697 | 1 | b3 |
| sp|P09603|CSF1_HUMAN | TFYETPLQLLEK | 745.405049 | 2 | 541.22929 | 1 | b4 |
| sp|Q06830|PRDX1_HUMAN | ADEGISFR | 447.719424 | 2 | 823.394458 | 1 | y7 |
| sp|Q06830|PRDX1_HUMAN | ADEGISFR | 447.719424 | 2 | 708.367515 | 1 | y6 |
| sp|Q06830|PRDX1_HUMAN | ADEGISFR | 447.719424 | 2 | 579.324922 | 1 | y5 |
| sp|Q06830|PRDX1_HUMAN | ADEGISFR | 447.719424 | 2 | 522.303458 | 1 | y4 |
| sp|Q06830|PRDX1_HUMAN | ADEGISFR | 447.719424 | 2 | 409.219394 | 1 | y3 |
| sp|Q06830|PRDX1_HUMAN | ADEGISFR | 452.723558 | 2 | 833.402727 | 1 | y7 |
| sp|Q06830|PRDX1_HUMAN | ADEGISFR | 452.723558 | 2 | 718.375784 | 1 | y6 |
| sp|Q06830|PRDX1_HUMAN | ADEGISFR | 452.723558 | 2 | 589.333191 | 1 | y5 |
| sp|Q06830|PRDX1_HUMAN | ADEGISFR | 452.723558 | 2 | 532.311727 | 1 | y4 |
| sp|Q06830|PRDX1_HUMAN | ADEGISFR | 452.723558 | 2 | 419.227663 | 1 | y3 |
| sp|Q06830|PRDX1_HUMAN | LVQAFQFTDK | 598.819138 | 2 | 984.478522 | 1 | y8 |
| sp|Q06830|PRDX1_HUMAN | LVQAFQFTDK | 598.819138 | 2 | 856.419945 | 1 | y7 |
| sp|Q06830|PRDX1_HUMAN | LVQAFQFTDK | 598.819138 | 2 | 785.382831 | 1 | y6 |
| sp|Q06830|PRDX1_HUMAN | LVQAFQFTDK | 598.819138 | 2 | 492.742899 | 2 | y8 |
| sp|Q06830|PRDX1_HUMAN | LVQAFQFTDK | 598.819138 | 2 | 341.218332 | 1 | b3 |
| sp|Q06830|PRDX1_HUMAN | LVQAFQFTDK | 602.826238 | 2 | 992.492721 | 1 | y8 |
| sp|Q06830|PRDX1_HUMAN | LVQAFQFTDK | 602.826238 | 2 | 864.434144 | 1 | y7 |
| sp|Q06830|PRDX1_HUMAN | LVQAFQFTDK | 602.826238 | 2 | 793.39703 | 1 | y6 |
| sp|Q06830|PRDX1_HUMAN | LVQAFQFTDK | 602.826238 | 2 | 496.749999 | 2 | y8 |
| sp|Q06830|PRDX1_HUMAN | LVQAFQFTDK | 602.826238 | 2 | 341.218332 | 1 | b3 |
| sp|O75556|SG2A1_HUMAN | TINSDISIPEYK | 690.356282 | 2 | 1165.573545 | 1 | y10 |
| sp|O75556|SG2A1_HUMAN | TINSDISIPEYK | 690.356282 | 2 | 1051.530617 | 1 | y9 |
| sp|O75556|SG2A1_HUMAN | TINSDISIPEYK | 690.356282 | 2 | 964.498589 | 1 | y8 |
| sp|O75556|SG2A1_HUMAN | TINSDISIPEYK | 690.356282 | 2 | 736.387582 | 1 | y6 |
| sp|O75556|SG2A1_HUMAN | TINSDISIPEYK | 690.356282 | 2 | 536.271489 | 1 | y4 |
| sp|O75556|SG2A1_HUMAN | TINSDISIPEYK | 694.363381 | 2 | 1173.587744 | 1 | y10 |
| sp|O75556|SG2A1_HUMAN | TINSDISIPEYK | 694.363381 | 2 | 1059.544816 | 1 | y9 |
| sp|O75556|SG2A1_HUMAN | TINSDISIPEYK | 694.363381 | 2 | 972.512788 | 1 | y8 |
| sp|O75556|SG2A1_HUMAN | TINSDISIPEYK | 694.363381 | 2 | 744.401781 | 1 | y6 |
| sp|O75556|SG2A1_HUMAN | TINSDISIPEYK | 694.363381 | 2 | 544.285688 | 1 | y4 |
| sp|O75556|SG2A1_HUMAN | ELLQEFIDSDAAAEAMGK | 646.643546 | 3 | 748.3658 | 1 | y8 |
| sp|O75556|SG2A1_HUMAN | ELLQEFIDSDAAAEAMGK | 646.643546 | 3 | 677.328687 | 1 | y7 |
| sp|O75556|SG2A1_HUMAN | ELLQEFIDSDAAAEAMGK | 646.643546 | 3 | 606.291573 | 1 | y6 |
| sp|O75556|SG2A1_HUMAN | ELLQEFIDSDAAAEAMGK | 646.643546 | 3 | 535.254459 | 1 | y5 |
| sp|O75556|SG2A1_HUMAN | ELLQEFIDSDAAAEAMGK | 646.643546 | 3 | 760.387582 | 1 | b6 |
| sp|O75556|SG2A1_HUMAN | ELLQEFIDSDAAAEAMGK | 649.314945 | 3 | 756.379999 | 1 | y8 |
| sp|O75556|SG2A1_HUMAN | ELLQEFIDSDAAAEAMGK | 649.314945 | 3 | 685.342886 | 1 | y7 |
| sp|O75556|SG2A1_HUMAN | ELLQEFIDSDAAAEAMGK | 649.314945 | 3 | 614.305772 | 1 | y6 |
| sp|O75556|SG2A1_HUMAN | ELLQEFIDSDAAAEAMGK | 649.314945 | 3 | 543.268658 | 1 | y5 |
| sp|O75556|SG2A1_HUMAN | ELLQEFIDSDAAAEAMGK | 649.314945 | 3 | 760.387582 | 1 | b6 |
| sp|P22626|ROA2_HUMAN | TLETVPLER | 529.298038 | 2 | 843.457058 | 1 | y7 |
| sp|P22626|ROA2_HUMAN | TLETVPLER | 529.298038 | 2 | 714.414465 | 1 | y6 |
| sp|P22626|ROA2_HUMAN | TLETVPLER | 529.298038 | 2 | 613.366787 | 1 | y5 |
| sp|P22626|ROA2_HUMAN | TLETVPLER | 529.298038 | 2 | 514.298373 | 1 | y4 |
| sp|P22626|ROA2_HUMAN | TLETVPLER | 529.298038 | 2 | 344.181612 | 1 | b3 |
| sp|P22626|ROA2_HUMAN | TLETVPLER | 534.302173 | 2 | 853.465327 | 1 | y7 |
| sp|P22626|ROA2_HUMAN | TLETVPLER | 534.302173 | 2 | 724.422734 | 1 | y6 |
| sp|P22626|ROA2_HUMAN | TLETVPLER | 534.302173 | 2 | 623.375056 | 1 | y5 |
| sp|P22626|ROA2_HUMAN | TLETVPLER | 534.302173 | 2 | 524.306642 | 1 | y4 |
| sp|P22626|ROA2_HUMAN | TLETVPLER | 534.302173 | 2 | 344.181612 | 1 | b3 |
| sp|P22626|ROA2_HUMAN | GGNFGFGDSR | 507.225405 | 2 | 785.357679 | 1 | y7 |
| sp|P22626|ROA2_HUMAN | GGNFGFGDSR | 507.225405 | 2 | 638.289265 | 1 | y6 |
| sp|P22626|ROA2_HUMAN | GGNFGFGDSR | 507.225405 | 2 | 581.267801 | 1 | y5 |
| sp|P22626|ROA2_HUMAN | GGNFGFGDSR | 507.225405 | 2 | 434.199387 | 1 | y4 |
| sp|P22626|ROA2_HUMAN | GGNFGFGDSR | 507.225405 | 2 | 376.161545 | 1 | b4 |
| sp|P22626|ROA2_HUMAN | GGNFGFGDSR | 512.229539 | 2 | 795.365948 | 1 | y7 |
| sp|P22626|ROA2_HUMAN | GGNFGFGDSR | 512.229539 | 2 | 648.297534 | 1 | y6 |
| sp|P22626|ROA2_HUMAN | GGNFGFGDSR | 512.229539 | 2 | 591.27607 | 1 | y5 |
| sp|P22626|ROA2_HUMAN | GGNFGFGDSR | 512.229539 | 2 | 444.207656 | 1 | y4 |
| sp|P22626|ROA2_HUMAN | GGNFGFGDSR | 512.229539 | 2 | 376.161545 | 1 | b4 |
| sp|P09211|GSTP1_HUMAN | ASCLYGQLPK | 568.792066 | 2 | 818.477066 | 1 | y7 |
| sp|P09211|GSTP1_HUMAN | ASCLYGQLPK | 568.792066 | 2 | 542.329673 | 1 | y5 |
| sp|P09211|GSTP1_HUMAN | ASCLYGQLPK | 568.792066 | 2 | 489.757495 | 2 | y8 |
| sp|P09211|GSTP1_HUMAN | ASCLYGQLPK | 568.792066 | 2 | 319.107067 | 1 | b3 |
| sp|P09211|GSTP1_HUMAN | ASCLYGQLPK | 572.799166 | 2 | 826.491265 | 1 | y7 |
| sp|P09211|GSTP1_HUMAN | ASCLYGQLPK | 572.799166 | 2 | 550.343872 | 1 | y5 |
| sp|P09211|GSTP1_HUMAN | ASCLYGQLPK | 572.799166 | 2 | 493.764595 | 2 | y8 |
| sp|P09211|GSTP1_HUMAN | ASCLYGQLPK | 572.799166 | 2 | 319.107067 | 1 | b3 |
| sp|P09211|GSTP1_HUMAN | TLGLYGK | 376.221071 | 2 | 650.387188 | 1 | y6 |
| sp|P09211|GSTP1_HUMAN | TLGLYGK | 376.221071 | 2 | 480.28166 | 1 | y4 |
| sp|P09211|GSTP1_HUMAN | TLGLYGK | 376.221071 | 2 | 367.197596 | 1 | y3 |
| sp|P09211|GSTP1_HUMAN | TLGLYGK | 376.221071 | 2 | 325.697232 | 2 | y6 |
| sp|P09211|GSTP1_HUMAN | TLGLYGK | 376.221071 | 2 | 272.160482 | 1 | b3 |
| sp|P09211|GSTP1_HUMAN | TLGLYGK | 380.228171 | 2 | 658.401387 | 1 | y6 |
| sp|P09211|GSTP1_HUMAN | TLGLYGK | 380.228171 | 2 | 488.295859 | 1 | y4 |
| sp|P09211|GSTP1_HUMAN | TLGLYGK | 380.228171 | 2 | 375.211795 | 1 | y3 |
| sp|P09211|GSTP1_HUMAN | TLGLYGK | 380.228171 | 2 | 329.704331 | 2 | y6 |
| sp|P09211|GSTP1_HUMAN | TLGLYGK | 380.228171 | 2 | 272.160482 | 1 | b3 |
| sp|Q01995|TAGL_HUMAN | TLMALGSLAVTK | 602.852124 | 2 | 990.565229 | 1 | y10 |
| sp|Q01995|TAGL_HUMAN | TLMALGSLAVTK | 602.852124 | 2 | 859.524744 | 1 | y9 |
| sp|Q01995|TAGL_HUMAN | TLMALGSLAVTK | 602.852124 | 2 | 788.48763 | 1 | y8 |
| sp|Q01995|TAGL_HUMAN | TLMALGSLAVTK | 602.852124 | 2 | 675.403566 | 1 | y7 |
| sp|Q01995|TAGL_HUMAN | TLMALGSLAVTK | 602.852124 | 2 | 417.216617 | 1 | b4 |
| sp|Q01995|TAGL_HUMAN | TLMALGSLAVTK | 606.859223 | 2 | 998.579428 | 1 | y10 |
| sp|Q01995|TAGL_HUMAN | TLMALGSLAVTK | 606.859223 | 2 | 867.538943 | 1 | y9 |
| sp|Q01995|TAGL_HUMAN | TLMALGSLAVTK | 606.859223 | 2 | 796.501829 | 1 | y8 |
| sp|Q01995|TAGL_HUMAN | TLMALGSLAVTK | 606.859223 | 2 | 683.417765 | 1 | y7 |
| sp|Q01995|TAGL_HUMAN | TLMALGSLAVTK | 606.859223 | 2 | 417.216617 | 1 | b4 |
| sp|Q01995|TAGL_HUMAN | EFTESQLQEGK | 648.309331 | 2 | 1019.50038 | 1 | y9 |
| sp|Q01995|TAGL_HUMAN | EFTESQLQEGK | 648.309331 | 2 | 789.410108 | 1 | y7 |
| sp|Q01995|TAGL_HUMAN | EFTESQLQEGK | 648.309331 | 2 | 574.319502 | 1 | y5 |
| sp|Q01995|TAGL_HUMAN | EFTESQLQEGK | 648.309331 | 2 | 461.235438 | 1 | y4 |
| sp|Q01995|TAGL_HUMAN | EFTESQLQEGK | 648.309331 | 2 | 333.176861 | 1 | y3 |
| sp|Q01995|TAGL_HUMAN | EFTESQLQEGK | 652.316431 | 2 | 1027.514579 | 1 | y9 |
| sp|Q01995|TAGL_HUMAN | EFTESQLQEGK | 652.316431 | 2 | 797.424307 | 1 | y7 |
| sp|Q01995|TAGL_HUMAN | EFTESQLQEGK | 652.316431 | 2 | 582.333701 | 1 | y5 |
| sp|Q01995|TAGL_HUMAN | EFTESQLQEGK | 652.316431 | 2 | 469.249637 | 1 | y4 |
| sp|Q01995|TAGL_HUMAN | EFTESQLQEGK | 652.316431 | 2 | 341.19106 | 1 | y3 |
| sp|P00441|SODC_HUMAN | AVCVLK | 345.204367 | 2 | 618.364344 | 1 | y5 |
| sp|P00441|SODC_HUMAN | AVCVLK | 345.204367 | 2 | 519.29593 | 1 | y4 |
| sp|P00441|SODC_HUMAN | AVCVLK | 345.204367 | 2 | 359.265282 | 1 | y3 |
| sp|P00441|SODC_HUMAN | AVCVLK | 345.204367 | 2 | 309.68581 | 2 | y5 |
| sp|P00441|SODC_HUMAN | AVCVLK | 345.204367 | 2 | 260.151603 | 2 | y4 |
| sp|P00441|SODC_HUMAN | AVCVLK | 349.211466 | 2 | 626.378543 | 1 | y5 |
| sp|P00441|SODC_HUMAN | AVCVLK | 349.211466 | 2 | 527.310129 | 1 | y4 |
| sp|P00441|SODC_HUMAN | AVCVLK | 349.211466 | 2 | 367.279481 | 1 | y3 |
| sp|P00441|SODC_HUMAN | AVCVLK | 349.211466 | 2 | 313.69291 | 2 | y5 |
| sp|P00441|SODC_HUMAN | AVCVLK | 349.211466 | 2 | 264.158703 | 2 | y4 |
| sp|P00441|SODC_HUMAN | TLVVHEK | 413.245078 | 2 | 611.351137 | 1 | y5 |
| sp|P00441|SODC_HUMAN | TLVVHEK | 413.245078 | 2 | 512.282723 | 1 | y4 |
| sp|P00441|SODC_HUMAN | TLVVHEK | 413.245078 | 2 | 362.721238 | 2 | y6 |
| sp|P00441|SODC_HUMAN | TLVVHEK | 413.245078 | 2 | 306.179206 | 2 | y5 |
| sp|P00441|SODC_HUMAN | TLVVHEK | 413.245078 | 2 | 314.207432 | 1 | b3 |
| sp|P00441|SODC_HUMAN | TLVVHEK | 417.252177 | 2 | 619.365336 | 1 | y5 |
| sp|P00441|SODC_HUMAN | TLVVHEK | 417.252177 | 2 | 520.296922 | 1 | y4 |
| sp|P00441|SODC_HUMAN | TLVVHEK | 417.252177 | 2 | 366.728338 | 2 | y6 |
| sp|P00441|SODC_HUMAN | TLVVHEK | 417.252177 | 2 | 310.186306 | 2 | y5 |
| sp|P00441|SODC_HUMAN | TLVVHEK | 417.252177 | 2 | 314.207432 | 1 | b3 |
| sp|P04083|ANXA1_HUMAN | GGPGSAVSPYPTFNPSSDVAALHK | 786.057118 | 3 | 965.48889 | 2 | y18 |
| sp|P04083|ANXA1_HUMAN | GGPGSAVSPYPTFNPSSDVAALHK | 786.057118 | 3 | 915.954683 | 2 | y17 |
| sp|P04083|ANXA1_HUMAN | GGPGSAVSPYPTFNPSSDVAALHK | 786.057118 | 3 | 872.438669 | 2 | y16 |
| sp|P04083|ANXA1_HUMAN | GGPGSAVSPYPTFNPSSDVAALHK | 786.057118 | 3 | 512.774731 | 2 | y10 |
| sp|P04083|ANXA1_HUMAN | GGPGSAVSPYPTFNPSSDVAALHK | 786.057118 | 3 | 526.261987 | 1 | b7 |
| sp|P04083|ANXA1_HUMAN | GGPGSAVSPYPTFNPSSDVAALHK | 788.728517 | 3 | 969.495989 | 2 | y18 |
| sp|P04083|ANXA1_HUMAN | GGPGSAVSPYPTFNPSSDVAALHK | 788.728517 | 3 | 919.961782 | 2 | y17 |
| sp|P04083|ANXA1_HUMAN | GGPGSAVSPYPTFNPSSDVAALHK | 788.728517 | 3 | 876.445768 | 2 | y16 |
| sp|P04083|ANXA1_HUMAN | GGPGSAVSPYPTFNPSSDVAALHK | 788.728517 | 3 | 516.78183 | 2 | y10 |
| sp|P04083|ANXA1_HUMAN | GGPGSAVSPYPTFNPSSDVAALHK | 788.728517 | 3 | 526.261987 | 1 | b7 |
| sp|P04083|ANXA1_HUMAN | DITSDTSGDFR | 607.270206 | 2 | 985.422129 | 1 | y9 |
| sp|P04083|ANXA1_HUMAN | DITSDTSGDFR | 607.270206 | 2 | 884.374451 | 1 | y8 |
| sp|P04083|ANXA1_HUMAN | DITSDTSGDFR | 607.270206 | 2 | 797.342423 | 1 | y7 |
| sp|P04083|ANXA1_HUMAN | DITSDTSGDFR | 607.270206 | 2 | 493.214703 | 2 | y9 |
| sp|P04083|ANXA1_HUMAN | DITSDTSGDFR | 607.270206 | 2 | 330.165962 | 1 | b3 |
| sp|P04083|ANXA1_HUMAN | DITSDTSGDFR | 612.274341 | 2 | 995.430398 | 1 | y9 |
| sp|P04083|ANXA1_HUMAN | DITSDTSGDFR | 612.274341 | 2 | 894.38272 | 1 | y8 |
| sp|P04083|ANXA1_HUMAN | DITSDTSGDFR | 612.274341 | 2 | 807.350692 | 1 | y7 |
| sp|P04083|ANXA1_HUMAN | DITSDTSGDFR | 612.274341 | 2 | 498.218837 | 2 | y9 |
| sp|P04083|ANXA1_HUMAN | DITSDTSGDFR | 612.274341 | 2 | 330.165962 | 1 | b3 |
| sp|Q01469|FABP5_HUMAN | ELGVGIALR | 464.284734 | 2 | 685.435535 | 1 | y7 |
| sp|Q01469|FABP5_HUMAN | ELGVGIALR | 464.284734 | 2 | 628.414071 | 1 | y6 |
| sp|Q01469|FABP5_HUMAN | ELGVGIALR | 464.284734 | 2 | 529.345657 | 1 | y5 |
| sp|Q01469|FABP5_HUMAN | ELGVGIALR | 464.284734 | 2 | 472.324194 | 1 | y4 |
| sp|Q01469|FABP5_HUMAN | ELGVGIALR | 464.284734 | 2 | 359.24013 | 1 | y3 |
| sp|Q01469|FABP5_HUMAN | ELGVGIALR | 469.288869 | 2 | 695.443804 | 1 | y7 |
| sp|Q01469|FABP5_HUMAN | ELGVGIALR | 469.288869 | 2 | 638.42234 | 1 | y6 |
| sp|Q01469|FABP5_HUMAN | ELGVGIALR | 469.288869 | 2 | 539.353926 | 1 | y5 |
| sp|Q01469|FABP5_HUMAN | ELGVGIALR | 469.288869 | 2 | 482.332463 | 1 | y4 |
| sp|Q01469|FABP5_HUMAN | ELGVGIALR | 469.288869 | 2 | 369.248399 | 1 | y3 |
| sp|Q01469|FABP5_HUMAN | LVVECVMNNVTCTR | 847.904767 | 2 | 995.439711 | 1 | y8 |
| sp|Q01469|FABP5_HUMAN | LVVECVMNNVTCTR | 847.904767 | 2 | 864.399226 | 1 | y7 |
| sp|Q01469|FABP5_HUMAN | LVVECVMNNVTCTR | 847.904767 | 2 | 537.244957 | 1 | y4 |
| sp|Q01469|FABP5_HUMAN | LVVECVMNNVTCTR | 847.904767 | 2 | 436.197279 | 1 | y3 |
| sp|Q01469|FABP5_HUMAN | LVVECVMNNVTCTR | 847.904767 | 2 | 741.828528 | 2 | y12 |
| sp|Q01469|FABP5_HUMAN | LVVECVMNNVTCTR | 852.908902 | 2 | 1005.44798 | 1 | y8 |
| sp|Q01469|FABP5_HUMAN | LVVECVMNNVTCTR | 852.908902 | 2 | 874.407495 | 1 | y7 |
| sp|Q01469|FABP5_HUMAN | LVVECVMNNVTCTR | 852.908902 | 2 | 547.253226 | 1 | y4 |
| sp|Q01469|FABP5_HUMAN | LVVECVMNNVTCTR | 852.908902 | 2 | 446.205548 | 1 | y3 |
| sp|Q01469|FABP5_HUMAN | LVVECVMNNVTCTR | 852.908902 | 2 | 746.832663 | 2 | y12 |
| sp|P08253|MMP2_HUMAN | IDAVYEAPQEEK | 696.338089 | 2 | 993.452367 | 1 | y8 |
| sp|P08253|MMP2_HUMAN | IDAVYEAPQEEK | 696.338089 | 2 | 830.389038 | 1 | y7 |
| sp|P08253|MMP2_HUMAN | IDAVYEAPQEEK | 696.338089 | 2 | 701.346445 | 1 | y6 |
| sp|P08253|MMP2_HUMAN | IDAVYEAPQEEK | 696.338089 | 2 | 630.309331 | 1 | y5 |
| sp|P08253|MMP2_HUMAN | IDAVYEAPQEEK | 696.338089 | 2 | 300.155397 | 1 | b3 |
| sp|P08253|MMP2_HUMAN | IDAVYEAPQEEK | 700.345188 | 2 | 1001.466566 | 1 | y8 |
| sp|P08253|MMP2_HUMAN | IDAVYEAPQEEK | 700.345188 | 2 | 838.403237 | 1 | y7 |
| sp|P08253|MMP2_HUMAN | IDAVYEAPQEEK | 700.345188 | 2 | 709.360644 | 1 | y6 |
| sp|P08253|MMP2_HUMAN | IDAVYEAPQEEK | 700.345188 | 2 | 638.32353 | 1 | y5 |
| sp|P08253|MMP2_HUMAN | IDAVYEAPQEEK | 700.345188 | 2 | 300.155397 | 1 | b3 |
| sp|P08253|MMP2_HUMAN | VDAAFNWSK | 519.256174 | 2 | 938.436657 | 1 | y8 |
| sp|P08253|MMP2_HUMAN | VDAAFNWSK | 519.256174 | 2 | 823.409714 | 1 | y7 |
| sp|P08253|MMP2_HUMAN | VDAAFNWSK | 519.256174 | 2 | 681.335487 | 1 | y5 |
| sp|P08253|MMP2_HUMAN | VDAAFNWSK | 519.256174 | 2 | 286.139747 | 1 | b3 |
| sp|P08253|MMP2_HUMAN | VDAAFNWSK | 523.263273 | 2 | 946.450856 | 1 | y8 |
| sp|P08253|MMP2_HUMAN | VDAAFNWSK | 523.263273 | 2 | 831.423913 | 1 | y7 |
| sp|P08253|MMP2_HUMAN | VDAAFNWSK | 523.263273 | 2 | 689.349686 | 1 | y5 |
| sp|P08253|MMP2_HUMAN | VDAAFNWSK | 523.263273 | 2 | 286.139747 | 1 | b3 |
| sp|P07237|PDIA1_HUMAN | ALAPEYAK | 431.737085 | 2 | 678.345717 | 1 | y6 |
| sp|P07237|PDIA1_HUMAN | ALAPEYAK | 431.737085 | 2 | 607.308603 | 1 | y5 |
| sp|P07237|PDIA1_HUMAN | ALAPEYAK | 431.737085 | 2 | 339.676496 | 2 | y6 |
| sp|P07237|PDIA1_HUMAN | ALAPEYAK | 431.737085 | 2 | 304.15794 | 2 | y5 |
| sp|P07237|PDIA1_HUMAN | ALAPEYAK | 431.737085 | 2 | 256.165568 | 1 | b3 |
| sp|P07237|PDIA1_HUMAN | ALAPEYAK | 435.744185 | 2 | 686.359916 | 1 | y6 |
| sp|P07237|PDIA1_HUMAN | ALAPEYAK | 435.744185 | 2 | 615.322802 | 1 | y5 |
| sp|P07237|PDIA1_HUMAN | ALAPEYAK | 435.744185 | 2 | 343.683596 | 2 | y6 |
| sp|P07237|PDIA1_HUMAN | ALAPEYAK | 435.744185 | 2 | 308.165039 | 2 | y5 |
| sp|P07237|PDIA1_HUMAN | ALAPEYAK | 435.744185 | 2 | 256.165568 | 1 | b3 |
| sp|P07237|PDIA1_HUMAN | ILEFFGLK | 483.786578 | 2 | 853.481817 | 1 | y7 |
| sp|P07237|PDIA1_HUMAN | ILEFFGLK | 483.786578 | 2 | 740.397753 | 1 | y6 |
| sp|P07237|PDIA1_HUMAN | ILEFFGLK | 483.786578 | 2 | 611.355159 | 1 | y5 |
| sp|P07237|PDIA1_HUMAN | ILEFFGLK | 483.786578 | 2 | 464.286745 | 1 | y4 |
| sp|P07237|PDIA1_HUMAN | ILEFFGLK | 483.786578 | 2 | 317.218332 | 1 | y3 |
| sp|P07237|PDIA1_HUMAN | ILEFFGLK | 487.793678 | 2 | 861.496016 | 1 | y7 |
| sp|P07237|PDIA1_HUMAN | ILEFFGLK | 487.793678 | 2 | 748.411952 | 1 | y6 |
| sp|P07237|PDIA1_HUMAN | ILEFFGLK | 487.793678 | 2 | 619.369358 | 1 | y5 |
| sp|P07237|PDIA1_HUMAN | ILEFFGLK | 487.793678 | 2 | 472.300944 | 1 | y4 |
| sp|P07237|PDIA1_HUMAN | ILEFFGLK | 487.793678 | 2 | 325.23253 | 1 | y3 |
| sp|P12830|CADH1_HUMAN | NLVQIK | 357.729063 | 2 | 600.407923 | 1 | y5 |
| sp|P12830|CADH1_HUMAN | NLVQIK | 357.729063 | 2 | 388.255445 | 1 | y3 |
| sp|P12830|CADH1_HUMAN | NLVQIK | 357.729063 | 2 | 300.7076 | 2 | y5 |
| sp|P12830|CADH1_HUMAN | NLVQIK | 357.729063 | 2 | 327.202681 | 1 | b3 |
| sp|P12830|CADH1_HUMAN | NLVQIK | 357.729063 | 2 | 200.139353 | 1 | a2 |
| sp|P12830|CADH1_HUMAN | NLVQIK | 361.736163 | 2 | 608.422122 | 1 | y5 |
| sp|P12830|CADH1_HUMAN | NLVQIK | 361.736163 | 2 | 396.269644 | 1 | y3 |
| sp|P12830|CADH1_HUMAN | NLVQIK | 361.736163 | 2 | 304.714699 | 2 | y5 |
| sp|P12830|CADH1_HUMAN | NLVQIK | 361.736163 | 2 | 327.202681 | 1 | b3 |
| sp|P12830|CADH1_HUMAN | NLVQIK | 361.736163 | 2 | 200.139353 | 1 | a2 |
| sp|P12830|CADH1_HUMAN | VFYSITGQGADTPPVGVFIIER | 789.417875 | 3 | 1126.661906 | 1 | y10 |
| sp|P12830|CADH1_HUMAN | VFYSITGQGADTPPVGVFIIER | 789.417875 | 3 | 1029.609142 | 1 | y9 |
| sp|P12830|CADH1_HUMAN | VFYSITGQGADTPPVGVFIIER | 789.417875 | 3 | 833.487965 | 1 | y7 |
| sp|P12830|CADH1_HUMAN | VFYSITGQGADTPPVGVFIIER | 789.417875 | 3 | 677.398087 | 1 | y5 |
| sp|P12830|CADH1_HUMAN | VFYSITGQGADTPPVGVFIIER | 789.417875 | 3 | 563.834591 | 2 | y10 |
| sp|P12830|CADH1_HUMAN | VFYSITGQGADTPPVGVFIIER | 792.753965 | 3 | 1136.670175 | 1 | y10 |
| sp|P12830|CADH1_HUMAN | VFYSITGQGADTPPVGVFIIER | 792.753965 | 3 | 1039.617411 | 1 | y9 |
| sp|P12830|CADH1_HUMAN | VFYSITGQGADTPPVGVFIIER | 792.753965 | 3 | 843.496234 | 1 | y7 |
| sp|P12830|CADH1_HUMAN | VFYSITGQGADTPPVGVFIIER | 792.753965 | 3 | 687.406356 | 1 | y5 |
| sp|P12830|CADH1_HUMAN | VFYSITGQGADTPPVGVFIIER | 792.753965 | 3 | 568.838726 | 2 | y10 |
| sp|P61604|CH10_HUMAN | FLPLFDR | 454.255445 | 2 | 647.351137 | 1 | y5 |
| sp|P61604|CH10_HUMAN | FLPLFDR | 454.255445 | 2 | 550.298373 | 1 | y4 |
| sp|P61604|CH10_HUMAN | FLPLFDR | 454.255445 | 2 | 437.214309 | 1 | y3 |
| sp|P61604|CH10_HUMAN | FLPLFDR | 454.255445 | 2 | 380.721238 | 2 | y6 |
| sp|P61604|CH10_HUMAN | FLPLFDR | 454.255445 | 2 | 324.179206 | 2 | y5 |
| sp|P61604|CH10_HUMAN | FLPLFDR | 459.25958 | 2 | 657.359406 | 1 | y5 |
| sp|P61604|CH10_HUMAN | FLPLFDR | 459.25958 | 2 | 560.306642 | 1 | y4 |
| sp|P61604|CH10_HUMAN | FLPLFDR | 459.25958 | 2 | 447.222578 | 1 | y3 |
| sp|P61604|CH10_HUMAN | FLPLFDR | 459.25958 | 2 | 385.725373 | 2 | y6 |
| sp|P61604|CH10_HUMAN | FLPLFDR | 459.25958 | 2 | 329.183341 | 2 | y5 |
| sp|P61604|CH10_HUMAN | VLLPEYGGTK | 538.802957 | 2 | 977.530223 | 1 | y9 |
| sp|P61604|CH10_HUMAN | VLLPEYGGTK | 538.802957 | 2 | 864.446159 | 1 | y8 |
| sp|P61604|CH10_HUMAN | VLLPEYGGTK | 538.802957 | 2 | 432.726718 | 2 | y8 |
| sp|P61604|CH10_HUMAN | VLLPEYGGTK | 538.802957 | 2 | 376.184686 | 2 | y7 |
| sp|P61604|CH10_HUMAN | VLLPEYGGTK | 538.802957 | 2 | 326.243818 | 1 | b3 |
| sp|P61604|CH10_HUMAN | VLLPEYGGTK | 542.810056 | 2 | 985.544422 | 1 | y9 |
| sp|P61604|CH10_HUMAN | VLLPEYGGTK | 542.810056 | 2 | 872.460358 | 1 | y8 |
| sp|P61604|CH10_HUMAN | VLLPEYGGTK | 542.810056 | 2 | 436.733817 | 2 | y8 |
| sp|P61604|CH10_HUMAN | VLLPEYGGTK | 542.810056 | 2 | 380.191785 | 2 | y7 |
| sp|P61604|CH10_HUMAN | VLLPEYGGTK | 542.810056 | 2 | 326.243818 | 1 | b3 |
| sp|P30086|PEBP1_HUMAN | VLTPTQVK | 443.273835 | 2 | 786.47198 | 1 | y7 |
| sp|P30086|PEBP1_HUMAN | VLTPTQVK | 443.273835 | 2 | 673.387916 | 1 | y6 |
| sp|P30086|PEBP1_HUMAN | VLTPTQVK | 443.273835 | 2 | 572.340238 | 1 | y5 |
| sp|P30086|PEBP1_HUMAN | VLTPTQVK | 443.273835 | 2 | 337.197596 | 2 | y6 |
| sp|P30086|PEBP1_HUMAN | VLTPTQVK | 443.273835 | 2 | 314.207432 | 1 | b3 |
| sp|P30086|PEBP1_HUMAN | VLTPTQVK | 447.280935 | 2 | 794.486179 | 1 | y7 |
| sp|P30086|PEBP1_HUMAN | VLTPTQVK | 447.280935 | 2 | 681.402115 | 1 | y6 |
| sp|P30086|PEBP1_HUMAN | VLTPTQVK | 447.280935 | 2 | 580.354437 | 1 | y5 |
| sp|P30086|PEBP1_HUMAN | VLTPTQVK | 447.280935 | 2 | 341.204696 | 2 | y6 |
| sp|P30086|PEBP1_HUMAN | VLTPTQVK | 447.280935 | 2 | 314.207432 | 1 | b3 |
| sp|P30086|PEBP1_HUMAN | LYEQLSGK | 469.2531 | 2 | 824.414859 | 1 | y7 |
| sp|P30086|PEBP1_HUMAN | LYEQLSGK | 469.2531 | 2 | 661.351531 | 1 | y6 |
| sp|P30086|PEBP1_HUMAN | LYEQLSGK | 469.2531 | 2 | 532.308937 | 1 | y5 |
| sp|P30086|PEBP1_HUMAN | LYEQLSGK | 469.2531 | 2 | 291.166296 | 1 | y3 |
| sp|P30086|PEBP1_HUMAN | LYEQLSGK | 469.2531 | 2 | 412.711068 | 2 | y7 |
| sp|P30086|PEBP1_HUMAN | LYEQLSGK | 473.260199 | 2 | 832.429058 | 1 | y7 |
| sp|P30086|PEBP1_HUMAN | LYEQLSGK | 473.260199 | 2 | 669.36573 | 1 | y6 |
| sp|P30086|PEBP1_HUMAN | LYEQLSGK | 473.260199 | 2 | 540.323136 | 1 | y5 |
| sp|P30086|PEBP1_HUMAN | LYEQLSGK | 473.260199 | 2 | 299.180495 | 1 | y3 |
| sp|P30086|PEBP1_HUMAN | LYEQLSGK | 473.260199 | 2 | 416.718167 | 2 | y7 |
| sp|P09466|PAEP_HUMAN | VLVEDDEIMQGFIR | 832.42163 | 2 | 1352.615092 | 1 | y11 |
| sp|P09466|PAEP_HUMAN | VLVEDDEIMQGFIR | 832.42163 | 2 | 751.391956 | 1 | y6 |
| sp|P09466|PAEP_HUMAN | VLVEDDEIMQGFIR | 832.42163 | 2 | 620.351471 | 1 | y5 |
| sp|P09466|PAEP_HUMAN | VLVEDDEIMQGFIR | 832.42163 | 2 | 492.292893 | 1 | y4 |
| sp|P09466|PAEP_HUMAN | VLVEDDEIMQGFIR | 837.425764 | 2 | 1362.623361 | 1 | y11 |
| sp|P09466|PAEP_HUMAN | VLVEDDEIMQGFIR | 837.425764 | 2 | 761.400225 | 1 | y6 |
| sp|P09466|PAEP_HUMAN | VLVEDDEIMQGFIR | 837.425764 | 2 | 630.35974 | 1 | y5 |
| sp|P09466|PAEP_HUMAN | VLVEDDEIMQGFIR | 837.425764 | 2 | 502.301162 | 1 | y4 |
| sp|P80188|NGAL_HUMAN | VPLQQNFQDNQFQGK | 597.632192 | 3 | 479.261259 | 1 | y4 |
| sp|P80188|NGAL_HUMAN | VPLQQNFQDNQFQGK | 597.632192 | 3 | 566.329673 | 1 | b5 |
| sp|P80188|NGAL_HUMAN | VPLQQNFQDNQFQGK | 597.632192 | 3 | 680.3726 | 1 | b6 |
| sp|P80188|NGAL_HUMAN | VPLQQNFQDNQFQGK | 597.632192 | 3 | 827.441014 | 1 | b7 |
| sp|P80188|NGAL_HUMAN | VPLQQNFQDNQFQGK | 597.632192 | 3 | 414.224145 | 2 | b7 |
| sp|P80188|NGAL_HUMAN | VPLQQNFQDNQFQGK | 600.303591 | 3 | 487.275458 | 1 | y4 |
| sp|P80188|NGAL_HUMAN | VPLQQNFQDNQFQGK | 600.303591 | 3 | 566.329673 | 1 | b5 |
| sp|P80188|NGAL_HUMAN | VPLQQNFQDNQFQGK | 600.303591 | 3 | 680.3726 | 1 | b6 |
| sp|P80188|NGAL_HUMAN | VPLQQNFQDNQFQGK | 600.303591 | 3 | 827.441014 | 1 | b7 |
| sp|P80188|NGAL_HUMAN | VPLQQNFQDNQFQGK | 600.303591 | 3 | 414.224145 | 2 | b7 |
| sp|P80188|NGAL_HUMAN | ELTSELK | 410.22655 | 2 | 577.319168 | 1 | y5 |
| sp|P80188|NGAL_HUMAN | ELTSELK | 410.22655 | 2 | 476.271489 | 1 | y4 |
| sp|P80188|NGAL_HUMAN | ELTSELK | 410.22655 | 2 | 389.239461 | 1 | y3 |
| sp|P80188|NGAL_HUMAN | ELTSELK | 410.22655 | 2 | 345.705254 | 2 | y6 |
| sp|P80188|NGAL_HUMAN | ELTSELK | 410.22655 | 2 | 289.163222 | 2 | y5 |
| sp|P80188|NGAL_HUMAN | ELTSELK | 414.23365 | 2 | 585.333367 | 1 | y5 |
| sp|P80188|NGAL_HUMAN | ELTSELK | 414.23365 | 2 | 484.285688 | 1 | y4 |
| sp|P80188|NGAL_HUMAN | ELTSELK | 414.23365 | 2 | 397.25366 | 1 | y3 |
| sp|P80188|NGAL_HUMAN | ELTSELK | 414.23365 | 2 | 349.712353 | 2 | y6 |
| sp|P80188|NGAL_HUMAN | ELTSELK | 414.23365 | 2 | 293.170321 | 2 | y5 |
| sp|Q14508|WFDC2_HUMAN | EGSCPQVNINFPQLGLCR | 697.003303 | 3 | 843.450533 | 1 | y7 |
| sp|Q14508|WFDC2_HUMAN | EGSCPQVNINFPQLGLCR | 697.003303 | 3 | 618.339192 | 1 | y5 |
| sp|Q14508|WFDC2_HUMAN | EGSCPQVNINFPQLGLCR | 697.003303 | 3 | 505.255128 | 1 | y4 |
| sp|Q14508|WFDC2_HUMAN | EGSCPQVNINFPQLGLCR | 697.003303 | 3 | 495.763112 | 2 | y8 |
| sp|Q14508|WFDC2_HUMAN | EGSCPQVNINFPQLGLCR | 697.003303 | 3 | 422.228905 | 2 | y7 |
| sp|Q14508|WFDC2_HUMAN | EGSCPQVNINFPQLGLCR | 700.339392 | 3 | 853.458802 | 1 | y7 |
| sp|Q14508|WFDC2_HUMAN | EGSCPQVNINFPQLGLCR | 700.339392 | 3 | 628.347461 | 1 | y5 |
| sp|Q14508|WFDC2_HUMAN | EGSCPQVNINFPQLGLCR | 700.339392 | 3 | 515.263397 | 1 | y4 |
| sp|Q14508|WFDC2_HUMAN | EGSCPQVNINFPQLGLCR | 700.339392 | 3 | 500.767246 | 2 | y8 |
| sp|Q14508|WFDC2_HUMAN | EGSCPQVNINFPQLGLCR | 700.339392 | 3 | 427.233039 | 2 | y7 |
| sp|Q14508|WFDC2_HUMAN | VSCVTPNF | 462.218203 | 2 | 478.229624 | 1 | y4 |
| sp|Q14508|WFDC2_HUMAN | VSCVTPNF | 462.218203 | 2 | 377.181946 | 1 | y3 |
| sp|Q14508|WFDC2_HUMAN | VSCVTPNF | 462.218203 | 2 | 347.138367 | 1 | b3 |
| sp|Q14508|WFDC2_HUMAN | VSCVTPNF | 462.218203 | 2 | 446.206781 | 1 | b4 |
| sp|Q14508|WFDC2_HUMAN | VSCVTPNF | 462.218203 | 2 | 547.254459 | 1 | b5 |
| sp|Q14508|WFDC2_HUMAN | VSCVTPNF | 467.231817 | 2 | 488.256852 | 1 | y4 |
| sp|Q14508|WFDC2_HUMAN | VSCVTPNF | 467.231817 | 2 | 387.209174 | 1 | y3 |
| sp|Q14508|WFDC2_HUMAN | VSCVTPNF | 467.231817 | 2 | 347.138367 | 1 | b3 |
| sp|Q14508|WFDC2_HUMAN | VSCVTPNF | 467.231817 | 2 | 446.206781 | 1 | b4 |
| sp|Q14508|WFDC2_HUMAN | VSCVTPNF | 467.231817 | 2 | 547.254459 | 1 | b5 |
| sp|P62937|PPIA_HUMAN | VSFELFADK | 528.274032 | 2 | 956.472374 | 1 | y8 |
| sp|P62937|PPIA_HUMAN | VSFELFADK | 528.274032 | 2 | 869.440346 | 1 | y7 |
| sp|P62937|PPIA_HUMAN | VSFELFADK | 528.274032 | 2 | 722.371932 | 1 | y6 |
| sp|P62937|PPIA_HUMAN | VSFELFADK | 528.274032 | 2 | 593.329339 | 1 | y5 |
| sp|P62937|PPIA_HUMAN | VSFELFADK | 528.274032 | 2 | 435.223811 | 2 | y7 |
| sp|P62937|PPIA_HUMAN | VSFELFADK | 532.281132 | 2 | 964.486573 | 1 | y8 |
| sp|P62937|PPIA_HUMAN | VSFELFADK | 532.281132 | 2 | 877.454545 | 1 | y7 |
| sp|P62937|PPIA_HUMAN | VSFELFADK | 532.281132 | 2 | 730.386131 | 1 | y6 |
| sp|P62937|PPIA_HUMAN | VSFELFADK | 532.281132 | 2 | 601.343538 | 1 | y5 |
| sp|P62937|PPIA_HUMAN | VSFELFADK | 532.281132 | 2 | 439.23091 | 2 | y7 |
| sp|P62937|PPIA_HUMAN | FEDENFILK | 577.790046 | 2 | 1007.504403 | 1 | y8 |
| sp|P62937|PPIA_HUMAN | FEDENFILK | 577.790046 | 2 | 878.461809 | 1 | y7 |
| sp|P62937|PPIA_HUMAN | FEDENFILK | 577.790046 | 2 | 763.434866 | 1 | y6 |
| sp|P62937|PPIA_HUMAN | FEDENFILK | 577.790046 | 2 | 634.392273 | 1 | y5 |
| sp|P62937|PPIA_HUMAN | FEDENFILK | 577.790046 | 2 | 392.145226 | 1 | b3 |
| sp|P62937|PPIA_HUMAN | FEDENFILK | 581.797146 | 2 | 1015.518602 | 1 | y8 |
| sp|P62937|PPIA_HUMAN | FEDENFILK | 581.797146 | 2 | 886.476008 | 1 | y7 |
| sp|P62937|PPIA_HUMAN | FEDENFILK | 581.797146 | 2 | 771.449065 | 1 | y6 |
| sp|P62937|PPIA_HUMAN | FEDENFILK | 581.797146 | 2 | 642.406472 | 1 | y5 |
| sp|P62937|PPIA_HUMAN | FEDENFILK | 581.797146 | 2 | 392.145226 | 1 | b3 |
| sp|P04792|HSPB1_HUMAN | LFDQAFGLPR | 582.314023 | 2 | 903.468292 | 1 | y8 |
| sp|P04792|HSPB1_HUMAN | LFDQAFGLPR | 582.314023 | 2 | 788.441349 | 1 | y7 |
| sp|P04792|HSPB1_HUMAN | LFDQAFGLPR | 582.314023 | 2 | 660.382771 | 1 | y6 |
| sp|P04792|HSPB1_HUMAN | LFDQAFGLPR | 582.314023 | 2 | 589.345657 | 1 | y5 |
| sp|P04792|HSPB1_HUMAN | LFDQAFGLPR | 582.314023 | 2 | 442.277243 | 1 | y4 |
| sp|P04792|HSPB1_HUMAN | LFDQAFGLPR | 587.318157 | 2 | 913.476561 | 1 | y8 |
| sp|P04792|HSPB1_HUMAN | LFDQAFGLPR | 587.318157 | 2 | 798.449618 | 1 | y7 |
| sp|P04792|HSPB1_HUMAN | LFDQAFGLPR | 587.318157 | 2 | 670.39104 | 1 | y6 |
| sp|P04792|HSPB1_HUMAN | LFDQAFGLPR | 587.318157 | 2 | 599.353926 | 1 | y5 |
| sp|P04792|HSPB1_HUMAN | LFDQAFGLPR | 587.318157 | 2 | 452.285512 | 1 | y4 |
| sp|P04792|HSPB1_HUMAN | LATQSNEITIPVTFESR | 953.499455 | 2 | 1162.64665 | 1 | y10 |
| sp|P04792|HSPB1_HUMAN | LATQSNEITIPVTFESR | 953.499455 | 2 | 1049.562586 | 1 | y9 |
| sp|P04792|HSPB1_HUMAN | LATQSNEITIPVTFESR | 953.499455 | 2 | 835.430844 | 1 | y7 |
| sp|P04792|HSPB1_HUMAN | LATQSNEITIPVTFESR | 953.499455 | 2 | 857.436323 | 1 | b8 |
| sp|P04792|HSPB1_HUMAN | LATQSNEITIPVTFESR | 953.499455 | 2 | 1071.568065 | 1 | b10 |
| sp|P04792|HSPB1_HUMAN | LATQSNEITIPVTFESR | 958.503589 | 2 | 1172.654919 | 1 | y10 |
| sp|P04792|HSPB1_HUMAN | LATQSNEITIPVTFESR | 958.503589 | 2 | 1059.570855 | 1 | y9 |
| sp|P04792|HSPB1_HUMAN | LATQSNEITIPVTFESR | 958.503589 | 2 | 845.439113 | 1 | y7 |
| sp|P04792|HSPB1_HUMAN | LATQSNEITIPVTFESR | 958.503589 | 2 | 857.436323 | 1 | b8 |
| sp|P04792|HSPB1_HUMAN | LATQSNEITIPVTFESR | 958.503589 | 2 | 1071.568065 | 1 | b10 |
| sp|P07339|CATD_HUMAN | VSTLPAITLK | 521.828974 | 2 | 943.582259 | 1 | y9 |
| sp|P07339|CATD_HUMAN | VSTLPAITLK | 521.828974 | 2 | 856.55023 | 1 | y8 |
| sp|P07339|CATD_HUMAN | VSTLPAITLK | 521.828974 | 2 | 755.502552 | 1 | y7 |
| sp|P07339|CATD_HUMAN | VSTLPAITLK | 521.828974 | 2 | 642.418488 | 1 | y6 |
| sp|P07339|CATD_HUMAN | VSTLPAITLK | 521.828974 | 2 | 321.712882 | 2 | y6 |
| sp|P07339|CATD_HUMAN | VSTLPAITLK | 525.836074 | 2 | 951.596458 | 1 | y9 |
| sp|P07339|CATD_HUMAN | VSTLPAITLK | 525.836074 | 2 | 864.564429 | 1 | y8 |
| sp|P07339|CATD_HUMAN | VSTLPAITLK | 525.836074 | 2 | 763.516751 | 1 | y7 |
| sp|P07339|CATD_HUMAN | VSTLPAITLK | 525.836074 | 2 | 650.432687 | 1 | y6 |
| sp|P07339|CATD_HUMAN | VSTLPAITLK | 525.836074 | 2 | 325.719981 | 2 | y6 |
| sp|P07339|CATD_HUMAN | VGFAEAAR | 410.719227 | 2 | 664.3413 | 1 | y6 |
| sp|P07339|CATD_HUMAN | VGFAEAAR | 410.719227 | 2 | 517.272886 | 1 | y5 |
| sp|P07339|CATD_HUMAN | VGFAEAAR | 410.719227 | 2 | 446.235772 | 1 | y4 |
| sp|P07339|CATD_HUMAN | VGFAEAAR | 410.719227 | 2 | 332.674288 | 2 | y6 |
| sp|P07339|CATD_HUMAN | VGFAEAAR | 410.719227 | 2 | 304.165568 | 1 | b3 |
| sp|P07339|CATD_HUMAN | VGFAEAAR | 415.723361 | 2 | 674.349569 | 1 | y6 |
| sp|P07339|CATD_HUMAN | VGFAEAAR | 415.723361 | 2 | 527.281155 | 1 | y5 |
| sp|P07339|CATD_HUMAN | VGFAEAAR | 415.723361 | 2 | 456.244041 | 1 | y4 |
| sp|P07339|CATD_HUMAN | VGFAEAAR | 415.723361 | 2 | 337.678423 | 2 | y6 |
| sp|P07339|CATD_HUMAN | VGFAEAAR | 415.723361 | 2 | 304.165568 | 1 | b3 |
| sp|P11166|GTR1_HUMAN | TFDEIASGFR | 571.77747 | 2 | 894.431572 | 1 | y8 |
| sp|P11166|GTR1_HUMAN | TFDEIASGFR | 571.77747 | 2 | 537.277972 | 1 | y5 |
| sp|P11166|GTR1_HUMAN | TFDEIASGFR | 571.77747 | 2 | 466.240858 | 1 | y4 |
| sp|P11166|GTR1_HUMAN | TFDEIASGFR | 571.77747 | 2 | 364.150312 | 1 | b3 |
| sp|P11166|GTR1_HUMAN | TFDEIASGFR | 571.77747 | 2 | 493.192905 | 1 | b4 |
| sp|P11166|GTR1_HUMAN | TFDEIASGFR | 576.781605 | 2 | 904.439841 | 1 | y8 |
| sp|P11166|GTR1_HUMAN | TFDEIASGFR | 576.781605 | 2 | 547.286241 | 1 | y5 |
| sp|P11166|GTR1_HUMAN | TFDEIASGFR | 576.781605 | 2 | 476.249127 | 1 | y4 |
| sp|P11166|GTR1_HUMAN | TFDEIASGFR | 576.781605 | 2 | 364.150312 | 1 | b3 |
| sp|P11166|GTR1_HUMAN | TFDEIASGFR | 576.781605 | 2 | 493.192905 | 1 | b4 |
| sp|P00338|LDHA_HUMAN | LVIITAGAR | 457.295102 | 2 | 701.43045 | 1 | y7 |
| sp|P00338|LDHA_HUMAN | LVIITAGAR | 457.295102 | 2 | 588.346386 | 1 | y6 |
| sp|P00338|LDHA_HUMAN | LVIITAGAR | 457.295102 | 2 | 475.262322 | 1 | y5 |
| sp|P00338|LDHA_HUMAN | LVIITAGAR | 457.295102 | 2 | 374.214643 | 1 | y4 |
| sp|P00338|LDHA_HUMAN | LVIITAGAR | 457.295102 | 2 | 326.243818 | 1 | b3 |
| sp|P00338|LDHA_HUMAN | LVIITAGAR | 462.299236 | 2 | 711.438719 | 1 | y7 |
| sp|P00338|LDHA_HUMAN | LVIITAGAR | 462.299236 | 2 | 598.354655 | 1 | y6 |
| sp|P00338|LDHA_HUMAN | LVIITAGAR | 462.299236 | 2 | 485.270591 | 1 | y5 |
| sp|P00338|LDHA_HUMAN | LVIITAGAR | 462.299236 | 2 | 384.222912 | 1 | y4 |
| sp|P00338|LDHA_HUMAN | LVIITAGAR | 462.299236 | 2 | 326.243818 | 1 | b3 |
| sp|P00338|LDHA_HUMAN | VTLTSEEEAR | 567.785492 | 2 | 1035.495294 | 1 | y9 |
| sp|P00338|LDHA_HUMAN | VTLTSEEEAR | 567.785492 | 2 | 934.447616 | 1 | y8 |
| sp|P00338|LDHA_HUMAN | VTLTSEEEAR | 567.785492 | 2 | 821.363552 | 1 | y7 |
| sp|P00338|LDHA_HUMAN | VTLTSEEEAR | 567.785492 | 2 | 720.315873 | 1 | y6 |
| sp|P00338|LDHA_HUMAN | VTLTSEEEAR | 567.785492 | 2 | 467.727446 | 2 | y8 |
| sp|P00338|LDHA_HUMAN | VTLTSEEEAR | 572.789627 | 2 | 1045.503563 | 1 | y9 |
| sp|P00338|LDHA_HUMAN | VTLTSEEEAR | 572.789627 | 2 | 944.455885 | 1 | y8 |
| sp|P00338|LDHA_HUMAN | VTLTSEEEAR | 572.789627 | 2 | 831.371821 | 1 | y7 |
| sp|P00338|LDHA_HUMAN | VTLTSEEEAR | 572.789627 | 2 | 730.324142 | 1 | y6 |
| sp|P00338|LDHA_HUMAN | VTLTSEEEAR | 572.789627 | 2 | 472.73158 | 2 | y8 |
| sp|P60174|TPIS_HUMAN | VVLAYEPVWAIGTGK | 801.948141 | 2 | 1220.631 | 1 | y11 |
| sp|P60174|TPIS_HUMAN | VVLAYEPVWAIGTGK | 801.948141 | 2 | 1057.567671 | 1 | y10 |
| sp|P60174|TPIS_HUMAN | VVLAYEPVWAIGTGK | 801.948141 | 2 | 928.525078 | 1 | y9 |
| sp|P60174|TPIS_HUMAN | VVLAYEPVWAIGTGK | 801.948141 | 2 | 312.228168 | 1 | b3 |
| sp|P60174|TPIS_HUMAN | VVLAYEPVWAIGTGK | 801.948141 | 2 | 383.265282 | 1 | b4 |
| sp|P60174|TPIS_HUMAN | VVLAYEPVWAIGTGK | 805.95524 | 2 | 1228.645199 | 1 | y11 |
| sp|P60174|TPIS_HUMAN | VVLAYEPVWAIGTGK | 805.95524 | 2 | 1065.58187 | 1 | y10 |
| sp|P60174|TPIS_HUMAN | VVLAYEPVWAIGTGK | 805.95524 | 2 | 936.539277 | 1 | y9 |
| sp|P60174|TPIS_HUMAN | VVLAYEPVWAIGTGK | 805.95524 | 2 | 312.228168 | 1 | b3 |
| sp|P60174|TPIS_HUMAN | VVLAYEPVWAIGTGK | 805.95524 | 2 | 383.265282 | 1 | b4 |
| sp|P60174|TPIS_HUMAN | SNVSDAVAQSTR | 617.804748 | 2 | 934.458849 | 1 | y9 |
| sp|P60174|TPIS_HUMAN | SNVSDAVAQSTR | 617.804748 | 2 | 847.426821 | 1 | y8 |
| sp|P60174|TPIS_HUMAN | SNVSDAVAQSTR | 617.804748 | 2 | 661.362764 | 1 | y6 |
| sp|P60174|TPIS_HUMAN | SNVSDAVAQSTR | 617.804748 | 2 | 562.29435 | 1 | y5 |
| sp|P60174|TPIS_HUMAN | SNVSDAVAQSTR | 617.804748 | 2 | 301.150646 | 1 | b3 |
| sp|P60174|TPIS_HUMAN | SNVSDAVAQSTR | 622.808882 | 2 | 944.467118 | 1 | y9 |
| sp|P60174|TPIS_HUMAN | SNVSDAVAQSTR | 622.808882 | 2 | 857.43509 | 1 | y8 |
| sp|P60174|TPIS_HUMAN | SNVSDAVAQSTR | 622.808882 | 2 | 671.371033 | 1 | y6 |
| sp|P60174|TPIS_HUMAN | SNVSDAVAQSTR | 622.808882 | 2 | 572.302619 | 1 | y5 |
| sp|P60174|TPIS_HUMAN | SNVSDAVAQSTR | 622.808882 | 2 | 301.150646 | 1 | b3 |
| sp|P05164|PERM_HUMAN | IANVFTNAFR | 576.811647 | 2 | 968.494841 | 1 | y8 |
| sp|P05164|PERM_HUMAN | IANVFTNAFR | 576.811647 | 2 | 854.451913 | 1 | y7 |
| sp|P05164|PERM_HUMAN | IANVFTNAFR | 576.811647 | 2 | 755.383499 | 1 | y6 |
| sp|P05164|PERM_HUMAN | IANVFTNAFR | 576.811647 | 2 | 608.315085 | 1 | y5 |
| sp|P05164|PERM_HUMAN | IANVFTNAFR | 581.815782 | 2 | 978.50311 | 1 | y8 |
| sp|P05164|PERM_HUMAN | IANVFTNAFR | 581.815782 | 2 | 864.460182 | 1 | y7 |
| sp|P05164|PERM_HUMAN | IANVFTNAFR | 581.815782 | 2 | 765.391768 | 1 | y6 |
| sp|P05164|PERM_HUMAN | IANVFTNAFR | 581.815782 | 2 | 618.323354 | 1 | y5 |
| sp|P05164|PERM_HUMAN | VVLEGGIDPILR | 640.88227 | 2 | 1082.620435 | 1 | y10 |
| sp|P05164|PERM_HUMAN | VVLEGGIDPILR | 640.88227 | 2 | 969.536371 | 1 | y9 |
| sp|P05164|PERM_HUMAN | VVLEGGIDPILR | 640.88227 | 2 | 613.366787 | 1 | y5 |
| sp|P05164|PERM_HUMAN | VVLEGGIDPILR | 640.88227 | 2 | 498.339844 | 1 | y4 |
| sp|P05164|PERM_HUMAN | VVLEGGIDPILR | 640.88227 | 2 | 541.813856 | 2 | y10 |
| sp|P05164|PERM_HUMAN | VVLEGGIDPILR | 645.886404 | 2 | 1092.628704 | 1 | y10 |
| sp|P05164|PERM_HUMAN | VVLEGGIDPILR | 645.886404 | 2 | 979.54464 | 1 | y9 |
| sp|P05164|PERM_HUMAN | VVLEGGIDPILR | 645.886404 | 2 | 623.375056 | 1 | y5 |
| sp|P05164|PERM_HUMAN | VVLEGGIDPILR | 645.886404 | 2 | 508.348113 | 1 | y4 |
| sp|P05164|PERM_HUMAN | VVLEGGIDPILR | 645.886404 | 2 | 546.81799 | 2 | y10 |
| sp|P14174|MIF_HUMAN | LLCGLLAER | 522.797151 | 2 | 818.418899 | 1 | y7 |
| sp|P14174|MIF_HUMAN | LLCGLLAER | 522.797151 | 2 | 658.38825 | 1 | y6 |
| sp|P14174|MIF_HUMAN | LLCGLLAER | 522.797151 | 2 | 488.282723 | 1 | y4 |
| sp|P14174|MIF_HUMAN | LLCGLLAER | 522.797151 | 2 | 375.198659 | 1 | y3 |
| sp|P14174|MIF_HUMAN | LLCGLLAER | 522.797151 | 2 | 409.713087 | 2 | y7 |
| sp|P14174|MIF_HUMAN | LLCGLLAER | 527.801286 | 2 | 828.427168 | 1 | y7 |
| sp|P14174|MIF_HUMAN | LLCGLLAER | 527.801286 | 2 | 668.396519 | 1 | y6 |
| sp|P14174|MIF_HUMAN | LLCGLLAER | 527.801286 | 2 | 498.290992 | 1 | y4 |
| sp|P14174|MIF_HUMAN | LLCGLLAER | 527.801286 | 2 | 385.206928 | 1 | y3 |
| sp|P14174|MIF_HUMAN | LLCGLLAER | 527.801286 | 2 | 414.717222 | 2 | y7 |
| sp|P14174|MIF_HUMAN | VYINYYDMNAANVGWNNSTFA | 809.695191 | 3 | 376.223083 | 1 | b3 |
| sp|P14174|MIF_HUMAN | VYINYYDMNAANVGWNNSTFA | 809.695191 | 3 | 490.26601 | 1 | b4 |
| sp|P14174|MIF_HUMAN | VYINYYDMNAANVGWNNSTFA | 809.695191 | 3 | 653.329339 | 1 | b5 |
| sp|P14174|MIF_HUMAN | VYINYYDMNAANVGWNNSTFA | 809.695191 | 3 | 624.273706 | 2 | b10 |
| sp|P14174|MIF_HUMAN | VYINYYDMNAANVGWNNSTFA | 809.695191 | 3 | 766.347934 | 2 | b13 |
| sp|P14174|MIF_HUMAN | VYINYYDMNAANVGWNNSTFA | 813.037601 | 3 | 376.223083 | 1 | b3 |
| sp|P14174|MIF_HUMAN | VYINYYDMNAANVGWNNSTFA | 813.037601 | 3 | 490.26601 | 1 | b4 |
| sp|P14174|MIF_HUMAN | VYINYYDMNAANVGWNNSTFA | 813.037601 | 3 | 653.329339 | 1 | b5 |
| sp|P14174|MIF_HUMAN | VYINYYDMNAANVGWNNSTFA | 813.037601 | 3 | 624.273706 | 2 | b10 |
| sp|P14174|MIF_HUMAN | VYINYYDMNAANVGWNNSTFA | 813.037601 | 3 | 766.347934 | 2 | b13 |
| sp|P01833|PIGR_HUMAN | GGCITLISSEGYVSSK | 829.40872 | 2 | 1270.652523 | 1 | y12 |
| sp|P01833|PIGR_HUMAN | GGCITLISSEGYVSSK | 829.40872 | 2 | 1056.520781 | 1 | y10 |
| sp|P01833|PIGR_HUMAN | GGCITLISSEGYVSSK | 829.40872 | 2 | 943.436717 | 1 | y9 |
| sp|P01833|PIGR_HUMAN | GGCITLISSEGYVSSK | 829.40872 | 2 | 321.176861 | 1 | y3 |
| sp|P01833|PIGR_HUMAN | GGCITLISSEGYVSSK | 833.415819 | 2 | 1278.666722 | 1 | y12 |
| sp|P01833|PIGR_HUMAN | GGCITLISSEGYVSSK | 833.415819 | 2 | 1064.53498 | 1 | y10 |
| sp|P01833|PIGR_HUMAN | GGCITLISSEGYVSSK | 833.415819 | 2 | 951.450916 | 1 | y9 |
| sp|P01833|PIGR_HUMAN | GGCITLISSEGYVSSK | 833.415819 | 2 | 329.19106 | 1 | y3 |
| sp|P01833|PIGR_HUMAN | VYTVDLGR | 461.753267 | 2 | 823.430844 | 1 | y7 |
| sp|P01833|PIGR_HUMAN | VYTVDLGR | 461.753267 | 2 | 660.367515 | 1 | y6 |
| sp|P01833|PIGR_HUMAN | VYTVDLGR | 461.753267 | 2 | 559.319837 | 1 | y5 |
| sp|P01833|PIGR_HUMAN | VYTVDLGR | 461.753267 | 2 | 460.251423 | 1 | y4 |
| sp|P01833|PIGR_HUMAN | VYTVDLGR | 461.753267 | 2 | 345.22448 | 1 | y3 |
| sp|P01833|PIGR_HUMAN | VYTVDLGR | 466.757401 | 2 | 833.439113 | 1 | y7 |
| sp|P01833|PIGR_HUMAN | VYTVDLGR | 466.757401 | 2 | 670.375784 | 1 | y6 |
| sp|P01833|PIGR_HUMAN | VYTVDLGR | 466.757401 | 2 | 569.328106 | 1 | y5 |
| sp|P01833|PIGR_HUMAN | VYTVDLGR | 466.757401 | 2 | 470.259692 | 1 | y4 |
| sp|P01833|PIGR_HUMAN | VYTVDLGR | 466.757401 | 2 | 355.232748 | 1 | y3 |
| sp|P05787|K2C8_HUMAN | WSLLQQQK | 515.787641 | 2 | 844.488693 | 1 | y7 |
| sp|P05787|K2C8_HUMAN | WSLLQQQK | 515.787641 | 2 | 757.456664 | 1 | y6 |
| sp|P05787|K2C8_HUMAN | WSLLQQQK | 515.787641 | 2 | 644.3726 | 1 | y5 |
| sp|P05787|K2C8_HUMAN | WSLLQQQK | 515.787641 | 2 | 531.288536 | 1 | y4 |
| sp|P05787|K2C8_HUMAN | WSLLQQQK | 515.787641 | 2 | 403.229959 | 1 | y3 |
| sp|P05787|K2C8_HUMAN | WSLLQQQK | 519.79474 | 2 | 852.502892 | 1 | y7 |
| sp|P05787|K2C8_HUMAN | WSLLQQQK | 519.79474 | 2 | 765.470863 | 1 | y6 |
| sp|P05787|K2C8_HUMAN | WSLLQQQK | 519.79474 | 2 | 652.386799 | 1 | y5 |
| sp|P05787|K2C8_HUMAN | WSLLQQQK | 519.79474 | 2 | 539.302735 | 1 | y4 |
| sp|P05787|K2C8_HUMAN | WSLLQQQK | 519.79474 | 2 | 411.244158 | 1 | y3 |
| sp|P05787|K2C8_HUMAN | LSELEAALQR | 565.31422 | 2 | 800.462478 | 1 | y7 |
| sp|P05787|K2C8_HUMAN | LSELEAALQR | 565.31422 | 2 | 687.378414 | 1 | y6 |
| sp|P05787|K2C8_HUMAN | LSELEAALQR | 565.31422 | 2 | 558.335821 | 1 | y5 |
| sp|P05787|K2C8_HUMAN | LSELEAALQR | 565.31422 | 2 | 487.298707 | 1 | y4 |
| sp|P05787|K2C8_HUMAN | LSELEAALQR | 565.31422 | 2 | 330.165962 | 1 | b3 |
| sp|P05787|K2C8_HUMAN | LSELEAALQR | 570.318354 | 2 | 810.470747 | 1 | y7 |
| sp|P05787|K2C8_HUMAN | LSELEAALQR | 570.318354 | 2 | 697.386683 | 1 | y6 |
| sp|P05787|K2C8_HUMAN | LSELEAALQR | 570.318354 | 2 | 568.34409 | 1 | y5 |
| sp|P05787|K2C8_HUMAN | LSELEAALQR | 570.318354 | 2 | 497.306976 | 1 | y4 |
| sp|P05787|K2C8_HUMAN | LSELEAALQR | 570.318354 | 2 | 330.165962 | 1 | b3 |
| sp|O43278|SPIT1_HUMAN | WYYDPTEQICK | 751.834659 | 2 | 1153.519401 | 1 | y9 |
| sp|O43278|SPIT1_HUMAN | WYYDPTEQICK | 751.834659 | 2 | 990.456072 | 1 | y8 |
| sp|O43278|SPIT1_HUMAN | WYYDPTEQICK | 751.834659 | 2 | 875.429129 | 1 | y7 |
| sp|O43278|SPIT1_HUMAN | WYYDPTEQICK | 751.834659 | 2 | 513.213246 | 1 | b3 |
| sp|O43278|SPIT1_HUMAN | WYYDPTEQICK | 751.834659 | 2 | 628.240189 | 1 | b4 |
| sp|O43278|SPIT1_HUMAN | WYYDPTEQICK | 755.841759 | 2 | 1161.5336 | 1 | y9 |
| sp|O43278|SPIT1_HUMAN | WYYDPTEQICK | 755.841759 | 2 | 998.470271 | 1 | y8 |
| sp|O43278|SPIT1_HUMAN | WYYDPTEQICK | 755.841759 | 2 | 883.443328 | 1 | y7 |
| sp|O43278|SPIT1_HUMAN | WYYDPTEQICK | 755.841759 | 2 | 513.213246 | 1 | b3 |
| sp|O43278|SPIT1_HUMAN | WYYDPTEQICK | 755.841759 | 2 | 628.240189 | 1 | b4 |
| sp|O43278|SPIT1_HUMAN | SFVYGGCLGNK | 601.287148 | 2 | 967.466577 | 1 | y9 |
| sp|O43278|SPIT1_HUMAN | SFVYGGCLGNK | 601.287148 | 2 | 868.398164 | 1 | y8 |
| sp|O43278|SPIT1_HUMAN | SFVYGGCLGNK | 601.287148 | 2 | 705.334835 | 1 | y7 |
| sp|O43278|SPIT1_HUMAN | SFVYGGCLGNK | 601.287148 | 2 | 334.176132 | 1 | b3 |
| sp|O43278|SPIT1_HUMAN | SFVYGGCLGNK | 605.294247 | 2 | 975.480776 | 1 | y9 |
| sp|O43278|SPIT1_HUMAN | SFVYGGCLGNK | 605.294247 | 2 | 876.412363 | 1 | y8 |
| sp|O43278|SPIT1_HUMAN | SFVYGGCLGNK | 605.294247 | 2 | 713.349034 | 1 | y7 |
| sp|O43278|SPIT1_HUMAN | SFVYGGCLGNK | 605.294247 | 2 | 334.176132 | 1 | b3 |
| sp|P06733|ENOA_HUMAN | TIAPALVSK | 450.28166 | 2 | 685.424302 | 1 | y7 |
| sp|P06733|ENOA_HUMAN | TIAPALVSK | 450.28166 | 2 | 614.387188 | 1 | y6 |
| sp|P06733|ENOA_HUMAN | TIAPALVSK | 450.28166 | 2 | 343.215789 | 2 | y7 |
| sp|P06733|ENOA_HUMAN | TIAPALVSK | 450.28166 | 2 | 307.697232 | 2 | y6 |
| sp|P06733|ENOA_HUMAN | TIAPALVSK | 450.28166 | 2 | 286.176132 | 1 | b3 |
| sp|P06733|ENOA_HUMAN | TIAPALVSK | 454.28876 | 2 | 693.438501 | 1 | y7 |
| sp|P06733|ENOA_HUMAN | TIAPALVSK | 454.28876 | 2 | 622.401387 | 1 | y6 |
| sp|P06733|ENOA_HUMAN | TIAPALVSK | 454.28876 | 2 | 347.222888 | 2 | y7 |
| sp|P06733|ENOA_HUMAN | TIAPALVSK | 454.28876 | 2 | 311.704331 | 2 | y6 |
| sp|P06733|ENOA_HUMAN | TIAPALVSK | 454.28876 | 2 | 286.176132 | 1 | b3 |
| sp|P06733|ENOA_HUMAN | YISPDQLADLYK | 713.366649 | 2 | 1149.57863 | 1 | y10 |
| sp|P06733|ENOA_HUMAN | YISPDQLADLYK | 713.366649 | 2 | 1062.546602 | 1 | y9 |
| sp|P06733|ENOA_HUMAN | YISPDQLADLYK | 713.366649 | 2 | 575.292953 | 2 | y10 |
| sp|P06733|ENOA_HUMAN | YISPDQLADLYK | 713.366649 | 2 | 531.776939 | 2 | y9 |
| sp|P06733|ENOA_HUMAN | YISPDQLADLYK | 713.366649 | 2 | 364.186697 | 1 | b3 |
| sp|P06733|ENOA_HUMAN | YISPDQLADLYK | 717.373749 | 2 | 1157.592829 | 1 | y10 |
| sp|P06733|ENOA_HUMAN | YISPDQLADLYK | 717.373749 | 2 | 1070.560801 | 1 | y9 |
| sp|P06733|ENOA_HUMAN | YISPDQLADLYK | 717.373749 | 2 | 579.300053 | 2 | y10 |
| sp|P06733|ENOA_HUMAN | YISPDQLADLYK | 717.373749 | 2 | 535.784038 | 2 | y9 |
| sp|P06733|ENOA_HUMAN | YISPDQLADLYK | 717.373749 | 2 | 364.186697 | 1 | b3 |
| sp|Q16658|FSCN1_HUMAN | FLIVAHDDGR | 381.536612 | 3 | 670.290327 | 1 | y6 |
| sp|Q16658|FSCN1_HUMAN | FLIVAHDDGR | 381.536612 | 3 | 498.267073 | 2 | y9 |
| sp|Q16658|FSCN1_HUMAN | FLIVAHDDGR | 381.536612 | 3 | 385.183009 | 2 | y7 |
| sp|Q16658|FSCN1_HUMAN | FLIVAHDDGR | 381.536612 | 3 | 335.648802 | 2 | y6 |
| sp|Q16658|FSCN1_HUMAN | FLIVAHDDGR | 381.536612 | 3 | 300.130245 | 2 | y5 |
| sp|Q16658|FSCN1_HUMAN | FLIVAHDDGR | 384.872701 | 3 | 680.298596 | 1 | y6 |
| sp|Q16658|FSCN1_HUMAN | FLIVAHDDGR | 384.872701 | 3 | 503.271207 | 2 | y9 |
| sp|Q16658|FSCN1_HUMAN | FLIVAHDDGR | 384.872701 | 3 | 390.187143 | 2 | y7 |
| sp|Q16658|FSCN1_HUMAN | FLIVAHDDGR | 384.872701 | 3 | 340.652936 | 2 | y6 |
| sp|Q16658|FSCN1_HUMAN | FLIVAHDDGR | 384.872701 | 3 | 305.134379 | 2 | y5 |
| sp|Q16658|FSCN1_HUMAN | YLAPSGPSGTLK | 595.82442 | 2 | 914.494172 | 1 | y10 |
| sp|Q16658|FSCN1_HUMAN | YLAPSGPSGTLK | 595.82442 | 2 | 843.457058 | 1 | y9 |
| sp|Q16658|FSCN1_HUMAN | YLAPSGPSGTLK | 595.82442 | 2 | 659.372266 | 1 | y7 |
| sp|Q16658|FSCN1_HUMAN | YLAPSGPSGTLK | 595.82442 | 2 | 457.750724 | 2 | y10 |
| sp|Q16658|FSCN1_HUMAN | YLAPSGPSGTLK | 595.82442 | 2 | 348.191782 | 1 | b3 |
| sp|Q16658|FSCN1_HUMAN | YLAPSGPSGTLK | 599.83152 | 2 | 922.508371 | 1 | y10 |
| sp|Q16658|FSCN1_HUMAN | YLAPSGPSGTLK | 599.83152 | 2 | 851.471257 | 1 | y9 |
| sp|Q16658|FSCN1_HUMAN | YLAPSGPSGTLK | 599.83152 | 2 | 667.386465 | 1 | y7 |
| sp|Q16658|FSCN1_HUMAN | YLAPSGPSGTLK | 599.83152 | 2 | 461.757824 | 2 | y10 |
| sp|Q16658|FSCN1_HUMAN | YLAPSGPSGTLK | 599.83152 | 2 | 348.191782 | 1 | b3 |
| sp|P43490|NAMPT_HUMAN | YDGHLPIEIK | 395.548517 | 3 | 599.376289 | 1 | y5 |
| sp|P43490|NAMPT_HUMAN | YDGHLPIEIK | 395.548517 | 3 | 511.287474 | 2 | y9 |
| sp|P43490|NAMPT_HUMAN | YDGHLPIEIK | 395.548517 | 3 | 453.774002 | 2 | y8 |
| sp|P43490|NAMPT_HUMAN | YDGHLPIEIK | 395.548517 | 3 | 300.191782 | 2 | y5 |
| sp|P43490|NAMPT_HUMAN | YDGHLPIEIK | 395.548517 | 3 | 473.177923 | 1 | b4 |
| sp|P43490|NAMPT_HUMAN | YDGHLPIEIK | 398.219917 | 3 | 607.390488 | 1 | y5 |
| sp|P43490|NAMPT_HUMAN | YDGHLPIEIK | 398.219917 | 3 | 515.294573 | 2 | y9 |
| sp|P43490|NAMPT_HUMAN | YDGHLPIEIK | 398.219917 | 3 | 457.781102 | 2 | y8 |
| sp|P43490|NAMPT_HUMAN | YDGHLPIEIK | 398.219917 | 3 | 304.198882 | 2 | y5 |
| sp|P43490|NAMPT_HUMAN | YDGHLPIEIK | 398.219917 | 3 | 473.177923 | 1 | b4 |
| sp|P43490|NAMPT_HUMAN | YLLETSGNLDGLEYK | 857.930342 | 2 | 1325.621952 | 1 | y12 |
| sp|P43490|NAMPT_HUMAN | YLLETSGNLDGLEYK | 857.930342 | 2 | 1196.579358 | 1 | y11 |
| sp|P43490|NAMPT_HUMAN | YLLETSGNLDGLEYK | 857.930342 | 2 | 1095.53168 | 1 | y10 |
| sp|P43490|NAMPT_HUMAN | YLLETSGNLDGLEYK | 857.930342 | 2 | 719.856646 | 2 | y13 |
| sp|P43490|NAMPT_HUMAN | YLLETSGNLDGLEYK | 857.930342 | 2 | 390.238733 | 1 | b3 |
| sp|P43490|NAMPT_HUMAN | YLLETSGNLDGLEYK | 861.937442 | 2 | 1333.636151 | 1 | y12 |
| sp|P43490|NAMPT_HUMAN | YLLETSGNLDGLEYK | 861.937442 | 2 | 1204.593557 | 1 | y11 |
| sp|P43490|NAMPT_HUMAN | YLLETSGNLDGLEYK | 861.937442 | 2 | 1103.545879 | 1 | y10 |
| sp|P43490|NAMPT_HUMAN | YLLETSGNLDGLEYK | 861.937442 | 2 | 723.863745 | 2 | y13 |
| sp|P43490|NAMPT_HUMAN | YLLETSGNLDGLEYK | 861.937442 | 2 | 390.238733 | 1 | b3 |
| sp|P40121|CAPG_HUMAN | YQEGGVESAFHK | 451.214086 | 3 | 502.277243 | 1 | y4 |
| sp|P40121|CAPG_HUMAN | YQEGGVESAFHK | 451.214086 | 3 | 466.235241 | 2 | y9 |
| sp|P40121|CAPG_HUMAN | YQEGGVESAFHK | 451.214086 | 3 | 295.158274 | 2 | y5 |
| sp|P40121|CAPG_HUMAN | YQEGGVESAFHK | 451.214086 | 3 | 535.214703 | 1 | b5 |
| sp|P40121|CAPG_HUMAN | YQEGGVESAFHK | 451.214086 | 3 | 634.283117 | 1 | b6 |
| sp|P40121|CAPG_HUMAN | YQEGGVESAFHK | 453.885486 | 3 | 510.291442 | 1 | y4 |
| sp|P40121|CAPG_HUMAN | YQEGGVESAFHK | 453.885486 | 3 | 470.242341 | 2 | y9 |
| sp|P40121|CAPG_HUMAN | YQEGGVESAFHK | 453.885486 | 3 | 299.165373 | 2 | y5 |
| sp|P40121|CAPG_HUMAN | YQEGGVESAFHK | 453.885486 | 3 | 535.214703 | 1 | b5 |
| sp|P40121|CAPG_HUMAN | YQEGGVESAFHK | 453.885486 | 3 | 634.283117 | 1 | b6 |
| sp|P40121|CAPG_HUMAN | EGNPEEDLTADK | 659.293878 | 2 | 1017.473496 | 1 | y9 |
| sp|P40121|CAPG_HUMAN | EGNPEEDLTADK | 659.293878 | 2 | 791.378139 | 1 | y7 |
| sp|P40121|CAPG_HUMAN | EGNPEEDLTADK | 659.293878 | 2 | 566.26185 | 2 | y10 |
| sp|P40121|CAPG_HUMAN | EGNPEEDLTADK | 659.293878 | 2 | 509.240386 | 2 | y9 |
| sp|P40121|CAPG_HUMAN | EGNPEEDLTADK | 659.293878 | 2 | 301.11426 | 1 | b3 |
| sp|P40121|CAPG_HUMAN | EGNPEEDLTADK | 663.300978 | 2 | 1025.487695 | 1 | y9 |
| sp|P40121|CAPG_HUMAN | EGNPEEDLTADK | 663.300978 | 2 | 799.392338 | 1 | y7 |
| sp|P40121|CAPG_HUMAN | EGNPEEDLTADK | 663.300978 | 2 | 570.268949 | 2 | y10 |
| sp|P40121|CAPG_HUMAN | EGNPEEDLTADK | 663.300978 | 2 | 513.247486 | 2 | y9 |
| sp|P40121|CAPG_HUMAN | EGNPEEDLTADK | 663.300978 | 2 | 301.11426 | 1 | b3 |
