# Supplementary material for: Targeted Proteomics Identifies Proteomic Signatures in Liquid Biopsies of the Endometrium to Diagnose Endometrial Cancer and Assist in the Prediction of the Optimal Surgical Treatment
Source: Oxford University Press journal article supplement (doi:10.1158/1078-0432.ccr-17-0474), 2017-08-08
Supplement: 10780432ccr170474-sup-179213_2_supp_4174459_vtg5d6.xlsx [file 10780432ccr170474-sup-179213_2_supp_4174459_vtg5d6.xlsx]

## Sheet: Supplementary Table S5
	EEC (n=20)	Non-EC control (n=18)
Age (years)
Average	66	61
Minimum	56	50
Maximum	81	83
Uterine condition
Premenopausal	-	-
Postmenopausal	20	18
Histologic grade
Grade 1	2
Grade 2	13
Grade 3	5
FIGO stage
IA	10
IB	4
II	3
IIIA	2
IIIB	-
IIIC1	-
IIIC2	-
IVA	-
IVB	1
Myometrial invasion
<50%	12
>50%	8
