# Supplementary material for: Targeted Proteomics Identifies Proteomic Signatures in Liquid Biopsies of the Endometrium to Diagnose Endometrial Cancer and Assist in the Prediction of the Optimal Surgical Treatment
Source: Oxford University Press journal article supplement (doi:10.1158/1078-0432.ccr-17-0474), 2017-08-08
Supplement: 10780432ccr170474-sup-179213_2_supp_4174462_qtg5d7.xlsx [file 10780432ccr170474-sup-179213_2_supp_4174462_qtg5d7.xlsx]

## Sheet: Supplementary Table S4
	FC (Control/Hyp)	ADJ. P-VALUE	AUC
NAMPT	7.00367	0.0317936	0.885965
ENOA	2.84645	0.0226494	0.877193
CATD	3.40497	0.0183236	0.871345
GSTP1	2.76347	0.0240301	0.847953
KPYM	2.74676	0.040693	0.815789
PPIA	2.45792	0.0386703	0.809942
CAPG	2.57353	0.0419392	0.795322
TAGL	2.34037	0.0467965	0.78655
MMP2	3.52155	0.0407471	0.780702
MIF	2.13366	0.0431765	0.777778
LEG3	2.04587	0.0395995	0.77193
CASP3	3.1966	0.0459376	0.763158
CLIC1	2.54355	0.0440812	0.760234
LEG1	2.19635	0.045417	0.760234
FSCN1	2.88903	0.0460618	0.75731
CTNB1	2.01502	0.0445045	0.754386
